# Tissue mimetic hyaluronan bioink containing collagen fibers with controlled orientation modulating cell morphology and alignment.

Andrea Schwab<sup>1</sup>, Christophe Helary<sup>2</sup>, Geoff Richards<sup>1</sup>, Mauro Alini<sup>1</sup>, David Eglin<sup>1</sup>, Matteo D'Este<sup>1\*</sup>

## Author affiliations and contact information

<sup>1</sup> AO Research Institute, Clavadelerstarsse 8, 7270 Davos, Switzerland

<sup>2</sup> Sorbonne Université | UPMC · Laboratoire de Chimie de la Matière Condensée de Paris (LCMCP), Paris, France

\*Corresponding author:

Matteo D'Este

matteo.deste@aofoundation.org

Clavadelerstarsse 8, 7270 Davos, Switzerland

## 1 Abstract

2 Biofabrication is providing scientists and clinicians the ability to produce engineered tissues  
3 with desired shapes, and gradients of composition and biological cues. Typical resolutions  
4 achieved with extrusion-based bioprinting are at the macroscopic level. However, for  
5 capturing the fibrillar nature of the extracellular matrix (ECM), it is necessary to arrange ECM  
6 components at smaller scales, down to the micron and the molecular level.

7 In this study, we introduce a bioink containing hyaluronan (HA) as tyramine derivative (THA)  
8 and collagen type 1 (Col 1). Similarly to other connective tissues, in this bioink Col is present  
9 in fibrillar form and HA as viscoelastic space filler. THA was enzymatically crosslinked under  
10 mild conditions allowing simultaneous Col fibrillogenesis, thus achieving a homogeneous  
11 distribution of Col fibrils within the viscoelastic HA-based matrix. THA-Col composite  
12 displayed synergistic properties in terms of storage modulus and shear-thinning, translating  
13 into good printability.

14 Shear-induced alignment of the Col fibrils along the printing direction was achieved and  
15 quantified via immunofluorescence and second harmonic generation. Cell-free and cell-laden  
16 constructs were printed and characterized, analyzing the influence of the controlled  
17 microscopic anisotropy on human bone marrow derived mesenchymal stromal cells (hMSC)  
18 migration.

19 THA-Col showed cell instructive properties modulating hMSC adhesion, morphology and  
20 sprouting from spheroids stimulated by the presence and the orientation of Col fibers. Actin  
21 filament staining showed that hMSCs embedded into aligned constructs displayed increased  
22 cytoskeleton alignment along the fibril direction. Based on gene expression of cartilage/bone  
23 markers and ECM production, hMSCs embedded into the bioink displayed chondrogenic  
24 differentiation comparable to standard pellet culture by means of proteoglycan production  
25 (Safranin O staining and proteoglycan quantification).

26 The possibility of printing matrix components with control over microscopic alignment brings  
27 biofabrication one step closer to capturing the complexity of native tissues.

28

1 Keywords: 3D bioprinting; extracellular matrix; hyaluronan; collagen; cell spheroid;  
2 chondrogenesis

3

## 4 1 Introduction

5 Biofabrication aims at engineering constructs recapitulating the complexity of mammal  
6 tissues concerning cell types, chemical and biological gradients, and multiscale architecture.

7 In extrusion-based 3D printing (3DP), the resolution is determined by the size of the nozzle,  
8 printing speed and offset, distance between nozzle and printing surface, with resolution  
9 ranging from the mm down to the micron range [1]. The physico-chemical properties of the  
10 biomaterial and bioink directly influence printing outcome and shape fidelity. The ink is most  
11 often a viscoelastic shear-thinning hydrogel (precursor) with good elasticity recovery after  
12 high shear and rapid gelation after extrusion [2-4]. In 3DP, high resolution must be  
13 compromised for cell viability, with typical resolutions in the hundreds of microns range [5].  
14 Thus, for standard extrusion-based techniques, which are the most versatile and widespread,  
15 only the macroscopic architecture can be deliberately designed.

16 By combining different biomaterial ink compositions, gradients of material composition and  
17 cellular distribution can be produced using 3D printing techniques [6-8]. Despite impressive  
18 advances, the field still lacks reliable methods to mimic tissue architectures not only by  
19 replicating the ECM composition, but also addressing the (macro)molecular organization  
20 within the biomaterial ink at (sub-) micron scale lengths, e.g. on fibrillar levels [9]. However, it  
21 is well-known how microarchitectural features provide specific and unique properties to  
22 natural tissues [10].

23 Col is the most abundant protein in the ECM, where it is found with a hierarchical fibrillar  
24 structure ranging from the triple helix at the molecular level, up to the fibrils and fibers on the  
25 microscopic level. Col structure, orientation and spatial arrangement are fundamental  
26 towards mechanical stability and anisotropic properties of tissues [11]. The network  
27 architecture is also crucial to transmit forces to cells via cell-matrix interaction and  
28 contributes to the matrix biochemical environment [12, 13].

1 To bring the 3DP technology one step closer to native tissue architectures, it is necessary to  
2 capture micro- and nanostructures within macroscopically complex scaffold geometries [14].  
3 Microarchitectural properties can be introduced with polymer self-assembling, a process  
4 where macromolecules arrange into stable non-covalent structures. Col 1 [15], fibrin [12],  
5 cellulose [16] and silk fibroin [17] are the most prominent materials self-assembling into  
6 fibrous structures.

7 Most studies printing Col 1 biomaterial inks employ soluble (acidic) and/or non-fibrillar Col 1  
8 inks or blended neutralized Col 1 (Col 1 fractions). Printing an acidic or neutral Col 1  
9 dispersion (20-40 mg/ml) of swollen Col fibrils with a high viscosity ( $>10^3$  P-s at shear rate of  
10 0.1 1/s) requires subsequent lyophilization and chemical crosslinking for scaffold stabilization  
11 [18]. Neutralized non fibrillar Col 1 (8 mg/ml) was held at low temperature before extrusion  
12 and gelation was induced by printing at 37°C [19]. In another study, neutralized Col 1  
13 fractions were printed at high concentrations (20-40 mg/ml) and lower temperature (4-15°C)  
14 during extrusion printing and gelled within pre warmed media [20].

15 However, only few studies investigated the formation and presence of Col 1 fibers within the  
16 printed hydrogel construct and the influence on cell migration [21-23]. Moreover, cell  
17 embedding is limited in the above-mentioned approaches either due to the acidic conditions  
18 or the post processing. Another drawback of printing neutralized Col 1 is the phase  
19 separation of the self-assembled fibrils from the liquid when extruded [23].

20 Hyaluronic acid or hyaluronan (HA) is another abundant ECM component osmotically  
21 capable of holding large amounts of water, and thus functioning as a space filler for fibrillar  
22 matrix components, thus providing compressive strength through fluid retention [24]. To our  
23 knowledge, methods to control the orientation of Col 1 fibers within a viscoelastic HA-based  
24 matrix for bio-fabrication has not been addressed before.

25 The aim of this study was the development of a THA-Col 1 composite biomaterial ink and the  
26 workflow to 3D print it, fabricating constructs with homogeneous composition and controlled  
27 Col fibril orientation at the microscopic level. In addition, the impact of the microscopic  
28 anisotropy on the behavior of the embedded hMSC was analyzed (Fig. 1). To this aim, the

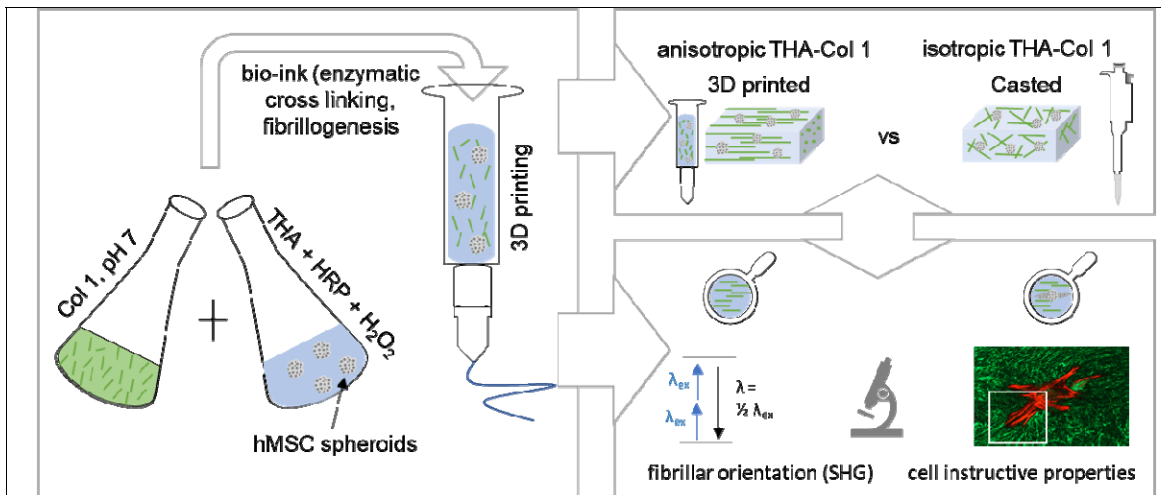

**Figure 1: 3D bioprinting as a tool to produce microscopic anisotropic scaffolds.** Biomaterial and bioink were prepared by mixing neutralized Col 1 (5 mg/ml) isolated from rat tails with tyramine modified HA (THA, 25 mg/ml). Neutralized Col 1 was mixed with THA for enzymatic crosslinking either cell free or containing hMSC cell spheroids. The Col 1 microstructure was investigated after 3D printing and compared to casted, isotropic samples with different microscopic techniques (Second Harmonic Generation SHG imaging and confocal microscopy). Cell instructive properties were analyzed after in vitro culture on cell migration and attachment.

1

2 tyramine derivative of HA (THA) was employed to form a continuous matrix where solubilized  
3 Col 1 was homogeneously dispersed; THA gelation and Col fibrillogenesis occurred without  
4 mutual interference. THA was additionally crosslinked with visible light for final shape  
5 fixation, thus achieving a uniform THA matrix containing Col fibrils, which were aligned via  
6 the shear forces experienced during the extrusion process. Fibril alignment and cytoskeleton  
7 orientation were quantified and compared to casted, isotropic constructs. hMSC spheroids  
8 were embedded in isotropic constructs with different compositions of THA and Col to  
9 compare their sprouting and chondrogenic differentiation.

## 1 2 Materials and Methods

### 2 2.1 Tyramine modified hyaluronic acid (THA) synthesis

3 THA was synthesized as previously described [25]. Briefly, HA (280-290 kDa, 5 mM  
4 carboxylic groups, Contipro Biotech S.R.O) was functionalized via 4-(4,6-dimethoxy-1,3,5-  
5 triazin-2-yl)-4-methylmorpholinium chloride (DMTMM, TDI) amidation with tyramine by mixing  
6 with a stoichiometric ratio of 1:1:1. Functionalization was performed for 24h at 37°C. THA  
7 was precipitated by dropwise adding Ethanol (96% v/v), isolated with Gooch filter No. 2 and  
8 dried. The degree of substitution was 6.6% as determined by absorbance reading at 275 nm  
9 (Multiskan™ GO Microplate Spectrophotometer, Thermo Fisher Scientific).

10

### 11 2.2 THA-Col 1 hydrogel preparation

12 THA (25 mg/ml) was reconstituted with minimum Essential Medium alpha ( $\alpha$ -MEM, Gibco)  
13 supplemented with 10% v/v bovine fetal serum containing peroxidase from horseradish  
14 (HRP, Sigma Aldrich) at the specified concentration at 4°C under agitation. THA for turbidity  
15 measurement was reconstituted with PBS. Enzymatic crosslinking was initiated by adding  
16 hydrogen peroxide ( $H_2O_2$ , Sigma Aldrich) in different concentrations and incubated for 30 min  
17 at 37°C. THA-Col 1 composite was prepared by neutralizing Col 1 (5 mg/ml, Collagen I rat  
18 tail in 0.2 N acetic acid, Corning) with NaOH and adding to THA before enzymatic  
19 crosslinking was initiated. Mixing ratios by volumes of THA (25 mg/ml) with Col 1 (5 mg/ml)  
20 are given in brackets for all experimental set ups described in the following paragraphs. For  
21 cell encapsulation, hMSC spheroids were resuspended with THA before adding  $H_2O_2$ .  
22 Additional light crosslinking using 0.2 mg/ml of Eosin Y as photoinitiator (Sigma Aldrich) was  
23 done for all printing experiments to stabilize the printed structures and the cell migration and  
24 cell differentiation studies. Non-aligned constructs were produced by pipetting the hydrogel  
25 precursor with a positive displacement pipette (CP1000, inner diameter ID 1.0 mm, Gilson)  
26 into custom made silicon molds (6 mm in diameter). Enzymatic crosslinking was performed  
27 for all samples for 30 min at 37°C.

1

## 2 2.3 3D bioprinting of THA-Col

3 An extrusion based bioprinter (3D Discovery™, RegenHU) was used to prepare anisotropic  
4 hydrogels (0.25" cylindrical needles, 15G: ID 1.36 mm, 0.2 bar, writing speed 8 mm/s; 18G:  
5 ID 0.84 mm, 1.6 bar, writing speed 8 mm/s, Nordson EFD) with subsequent light crosslinking  
6 (515 nm LED, speed 4 mm/s). Biomaterial and bioink were transferred into 3CC barrel (ID  
7 2.3 mm, Nordson) for enzymatic crosslinking (30 min, 37°C), printed with the above-  
8 mentioned parameters and transferred into culture media (cell embedded hydrogel) or PBS  
9 (cell free).

10 A complex microstructure to mimic microarchitecture of Col fibers in articular cartilage was  
11 accomplished with CAD Software (RegenHU). Fibrillar structure in the superficial zone (SZ at  
12 the surface) was realized by printing 3 layers of parallel lines, whereas the Middle (MZ) and  
13 deep zone (DZ) were designed as circular structures to mimic the arch like geometry.

14

## 15 2.4 Rheological characterization

16 Viscoelastic properties of the biomaterial inks were analyzed using Anton-Paar MCR-302  
17 rheometer with 1° cone-plate geometry and gap distance of 0.049 mm at 20°C. Silicone oil  
18 (Sigma Aldrich) was applied to the external border to prevent drying during the  
19 measurement. Viscosity was measured with shear rate ranging from 0.01 1/s to 100 1/s  
20 (n=2/group) to evaluate shear thinning behavior of the enzymatically crosslinked THA  
21 (0.3 U/ml HRP, 0.52 mM H<sub>2</sub>O<sub>2</sub>), THA-Col 1 (1:1 v/v) and Col 1 in a rotational experiment.

22 Oscillatory tests (amplitude sweep: frequency 1 Hz, amplitude 0.01 - 100% strain; frequency  
23 sweep: amplitude 1% strain, frequency 0.01 - 100 Hz, n=2/group) were performed with  
24 parallel plate measuring system at 20°C to characterize the elastic modulus of THA and  
25 THA-Col 1 at varying polymer concentrations (0.3 U/ml HRP, 0.65 mM H<sub>2</sub>O<sub>2</sub>).

26

## 1 2.5 Turbidity measurement

2 Fibrillation of Col 1 was evaluated by absorbance reading at 313 nm at 37°C at 5, 30 and  
3 60 min after induction of neutralization of Col 1 and enzymatic gelation (n=2-5  
4 samples/group) of freshly prepared materials with a Multiskan™ GO Microplate Spectrometer  
5 (Thermo Scientific). The following solutions were analyzed: neutralized Col 1, acidic Col 1,  
6 THA (0.075 U/ml HRP, 0.26 mM H<sub>2</sub>O<sub>2</sub>) and THA-Col 1 (1:1 and 1:2 v/v) composite  
7 undergoing enzymatic cross-linking during measurement of Col 1 fibrillogenesis.  
8 Temperature was held at 37°C to induce enzymatic crosslinking of THA and stabilize Col 1  
9 fibrillation.

10

## 11 2.6 Second harmonic generation (SHG) imaging

12 To visualize Col 1 fibers (0.3 U/ml HRP, 0.52 mM H<sub>2</sub>O<sub>2</sub>) (1:1 v/v) SHG images were acquired  
13 with a MaiTai multi-photon laser equipped confocal microscope (Leica SP8). SHG signal was  
14 collected with HyD detector between 437-453 nm ( $\lambda_{ex}$  880 nm, output power ap 1.7 W).  
15 Additionally, transmitted light and autofluorescence signal (510 - 600 nm) was acquired with  
16 varying emission wavelength for SHG detector ( $\lambda_{em}$  420-436 nm and  $\lambda_{em}$  454-470 nm) to  
17 check for the specificity of SHG signal at 437-453 nm. For deep imaging a long-distance  
18 objective (25x water-immersion objective) was used to acquire z-stacks with optimal settings  
19 for each sample. Image series acquired with Leica Application Suite X software (LAS X,  
20 Leica) were processed with ImageJ (National Institute of health, NIH).

21

## 22 2.7 Cell culture

### 23 2.7.1 Cell isolation

24 hMSCs were isolated from bone marrow aspirate with full ethical approval (Ethics committee  
25 of University of Freiburg Medical Centre - EK-Freiburg: 135/14) as described elsewhere [26].  
26 hMSCs were sub-cultured with  $\alpha$ -MEM (Gibco) supplemented with 10% v/v Sera Plus bovine  
27 serum (PAN Biotech), 100 U/ml Penicillin, 100 ug/ml Streptomycin (Gibco) and 5 ng/ml basic



1 Fibroblast Growth Factor (FGFb, Fitzgerald Industries International) in a humidified  
2 atmosphere of 5% CO<sub>2</sub> with media change every second day.

3

#### 4 2.7.2 Cell migration and viability study

5 Cell spheroids were prepared from hMSC (passage 3-4) in ultra-low attachment petri dish  
6 (Corning) with  $\alpha$ -MEM media supplemented with 10% bovine serum and 100 U/ml Penicillin,  
7 100 ug/ml Streptomycin before embedded in hydrogels. Cell spheroid suspension was added  
8 for (enzymatic) crosslinking (0.3 U/ml HRP, 0.39 mM H<sub>2</sub>O<sub>2</sub>) into THA-Col 1(1:1 v/v) or THA or  
9 Col 1 at final cell density of 3 Mio/ml and cultured for 8 days. For THA-Col 1 and THA, an  
10 additional light crosslinking of printed and casted samples was done at 515 nm.

11 To evaluate cell migration, samples at day 0, 3, and 8 were stained with phalloidin as  
12 described in 2.8.1 and fluorescent images were taken for subsequent quantification of  
13 migration length and area (n=3-5 spheroids/timepoint) described in Chapter 2.9.

14 Live and Dead assay was performed during the migration experiment of hMSC spheroids  
15 embedded in THA-Col 1 (0.3 U/ml HRP, 0.39 mM H<sub>2</sub>O<sub>2</sub>, 1:1 v/v) of 3D printed and casted  
16 samples at day 1 and day 6. H<sub>2</sub>O<sub>2</sub> concentration was selected in a range known not to be cell  
17 toxic [27]. After washing with PBS, samples were incubated with 2  $\mu$ M Calcein AM (Sigma  
18 Aldrich) and 1  $\mu$ M Ethidium homodimer-1 (Sigma Aldrich) for 30 min at 37°C, washed with  
19 PBS and imaged using confocal microscope (LSM800, Carl Zeiss). Dead cells were stained  
20 with Ethidium homodimer-1 in red ( $\lambda_{ex}$  561 nm), cytoplasm of living cells was stained with  
21 Calcein-AM in green ( $\lambda_{ex}$  488 nm).

22

#### 23 2.7.3 Chondrogenic differentiation

24 For chondrogenic differentiation, hMSC (passage 2) were seeded in 6 well microwell plate  
25 (AggreWell™ 400 plate) at 1.67 Mio/well for 3 days to form cell spheroids. Chondrogenic  
26 media was composed of high glucose Dulbecco's Modified Eagle Medium (DMEM HG,  
27 Gibco) supplemented with non-essential amino acids (1% v/v, Gibco), ascorbic acid 2  
28 phosphate (50 ug/ml, Sigma Aldrich), dexamethasone (100 nM, Sigma Aldrich), ITS+ premix

1 (1% v/v, Corning), TGF  $\beta$ 1 (10 ng/ml, Fitzgerald) and antibiotics (10 U/ml Penicillin, 10  $\mu$ g/ml  
2 Streptomycin, Gibco). Cell spheroids were embedded in THA-Col 1 (0.5 U/ml HRP, 0.65 mM  
3 H<sub>2</sub>O<sub>2</sub>, 5% w/v Col 1, 1:1 v/v) at final cell concentration of 5 Mio/ml hydrogel volume  
4 (400,000 cells/scaffold) before enzymatic gelation, additionally light cross linked, and  
5 cultured for 21 days with chondrogenic media. Media was changed 3 times a week. For  
6 positive control, standard hMSC pellets were prepared by seeding 250,000 hMSCs into each  
7 of a 96 V-Bottom well plate (Ratiolab) and cultured under same conditions.

8

## 9 2.8 Histological processing and staining

### 10 2.8.1 Actin filament-Col 1 immunofluorescence staining

11 For actin filament staining in combination with Col 1 immuno fluorescent staining, printed and  
12 casted THA-Col 1 (1:1 v/v) were fixed with 4% neutral buffered formalin (Formafix AG) at  
13 room temperature and stored in PBS at 4°C upon staining.

14 Cytoskeletal organization of hMSC sprouting from cell spheroids embedded in enzymatically  
15 cross linked THA-Col 1 samples (0.3 U/ml HRP, 0.39 mM H<sub>2</sub>O<sub>2</sub>) were analyzed on day 0 and  
16 after 6 days culture with Phalloidin staining to visualize actin filaments. Hydrogels were  
17 permeabilized with 0.5% v/v Triton X-100 (Sigma Aldrich) for 10 min at room temperature,  
18 blocked with 10% bovine serum (Sera plus) for 30 min and stained with Phalloidin-TRITC  
19 (2  $\mu$ g/ml, P1951, Sigma Aldrich) for 45 min at room temperature. Immunofluorescence  
20 staining for Col 1 was processed directly after phalloidin staining by overnight incubation with  
21 primary antibody (COL 1, 1:5,000 dilution with PBST, monoclonal, Sigma Aldrich).  
22 Secondary antibody Goat anti mouse, Alexa fluor 488 (Invitrogen, 1:600 diluted with PBST)  
23 was incubated for 1h. Cell nuclei were stained with DAPI (2  $\mu$ g/ml, Sigma Aldrich) for 10  
24 min. Samples were washed between every step with Tween-20 (P1379, Sigma Aldrich) 0.1%  
25 v/v in PBS and stored in PBS for microscopy.

26 A confocal microscope (LSM800, Carl Zeiss) was used to acquire fluorescence images (25x,  
27 40x water-immersion objectives) to visualize Col 1 matrix and cells. Col 1 fibers within the  
28 hydrogel matrix were stained in green ( $\lambda_{ex}$  488 nm), cell cytoskeleton in red ( $\lambda_{ex}$  561 nm) and

1 cell nuclei were stained with DAPI in blue ( $\lambda_{\text{ex}}$  405 nm). For all samples, z-stack images were  
2 acquired for the three single channels and processed with ImageJ (National Institute of  
3 health, NIH) to generate 2D z-projection (max intensity) images. Brightness and contrast  
4 settings were adjusted to increase contrast of the single channel images. Merged images of  
5 single channels were created with the image overlay tool (merge channels) with ImageJ  
6 software (NIH). Images of Col 1 stained samples and cytoskeleton were further processed  
7 with ImageJ to quantify fiber orientation and direction of migration as described in 2.10.

8

### 9 2.8.2 Cryo embedding

10 For histological staining, samples were fixed for 30 min with 4% neutral buffered formalin  
11 (Formafix AG) at room temperature and stored, washed with PBS and processed with  
12 Sucrose (150 mg/ml and 300 mg/ml, Sigma Aldrich) before being embedded in tissue  
13 freezing medium (Leica). Samples were cut with a cryostat microtome (HM 500 OM, Zeiss) to  
14 8  $\mu\text{m}$  slices and kept at  $-20^{\circ}\text{C}$  until processed for histological staining with safranin O-fast  
15 green.

16

### 17 2.8.3 Safranin O-Fast Green staining

18 To stain the proteoglycans in ECM within hydrogel samples and cell pellets, safranin O  
19 staining was performed after 21 days of chondrogenic differentiation. Slides were washed  
20 with water to remove the cryo-compound and stained with Weigert's Haematoxylin (12min,  
21 room temperature, Sigma Aldrich), blued with tap water (10 min), rinsed with deionized water  
22 and stained with Fast Green (0.02% w/v, Fluka) for 6 min to visualize collagenous matrix in  
23 green/blue. After washing with acetic acid (1%, Fluka) samples were incubated with  
24 safranin O (0.1%, 15 min, Polysciences) to stain proteoglycans in red. After washing with  
25 deionized water, staining was differentiated with Ethanol (70%, Alcosuisse) and  
26 subsequently dehydrated with series of alcohols (ethanol 96%, ethanol absolute, xylene) and  
27 cover slipped (Eukitt, Sigma Aldrich). Microscopic evaluation was performed with brightfield  
28 microscope (Olympus BX63, Olympus).

1

## 2 2.9 Quantification of cell migration length and area

3 A sprout morphology tool in ImageJ (NIH) was used to quantify the migration length on  
4 phalloidin stained MAX projection images. For bead and sprout detection the mean threshold  
5 method was selected with sample specific adjustment of values (Bead detection: blur radius  
6 for bead detection 1.0, minimum bead radius 30-110  $\mu\text{m}$ , dilate beads by factor 1.0-2.8;  
7 Sprout detection: sprout detection radius 1.0  $\mu\text{m}$ , minimal plexus area 5,000  $\mu\text{m}^2$ , minimal  
8 sprout area 500  $\mu\text{m}^2$ ). Migration area was calculated based on resulting black and white  
9 mask from Sprout morphology tool results with ROI area measurement. The calculated area  
10 includes the area of the cell spheroids.

11

## 12 2.10 Evaluation of Col 1 fiber and cytoskeleton alignment

13 2D fast Fourier transform (FFT) of images acquired with SHG and confocal microscopy for  
14 Col 1 immunostaining were used for the evaluation of Col 1 fiber alignment. For both  
15 microscopic techniques, single channel images at one focus plane were used ( $n = 2-3$   
16 samples with 3 focus planes at the beginning, center and end of a printed filament) to  
17 investigate the homogeneity of alignment at different z-locations within the strut. For  
18 quantification of cytoskeleton orientation, MAX projection images of the red channel (561 nm)  
19 of  $n=4$  spheroids at day 6 were processed. The Oval profile plug-in in ImageJ (NIH) was  
20 chosen for quantitative evaluation of the Col 1 fiber and cytoskeleton orientation as detailed  
21 described elsewhere [28, 29]. In brief, single images were processed with ImageJ (NIH)  
22 including unsharp mask, FFT processed, rotated 90° right, a circular selection with radius  
23 512 made, oval plug in for radial sum executed with number of points 360. The resulting grey  
24 values were normalized to the maximum grey values of each single image and mean values  
25 including standard deviation for both, SHG and confocal images, were shown in the bar  
26 diagram.

27

## 1 2.11 Gene expression analysis: Real-Time Quantitative Polymerase Chain

### 2 Reaction (PCR)

3 Total RNA was isolated from the samples (THA-Col 1, THA-Col 1 MSC and MSC pellet) at  
4 day 0, 14 and 21 using TriReagent® (Molecular Research Centre Inc.) following the  
5 manufacturers' protocol. RNA quantity was measured with NanoDrop 1000  
6 spectrophotometer (Thermo Fischer). cDNA synthesis of 1 µg RNA was performed with Vilo  
7 Superscript (Invitrogen) according to the manufacturer's protocol. Reverse transcription was  
8 carried out with Thermocycler (Mastercycler gradient, Eppendorf) including a pre-heating at  
9 25°C for 10 min, followed by 42°C for 120 min, inactivation of RT for 5 min at 85°C and  
10 cooling down to 4°C.

11 For real time PCR, 10ul of reaction mixture containing TaqMan Universal Master Mix  
12 (Thermo Fischer), primer and probes, DEPC water and cDNA was loaded into 384 well  
13 plates. PCR was run with an initial heating to 50°C for 2 min, 95°C for 10 min, 40 cycles at  
14 95°C for 15 s with the annealing at 60°C for 1 min.

15 Relative gene expression of the chondrogenic associated genes Aggrecan (*ACAM*), Col type  
16 2 (*COL2A1*) and *SOX9*, fibrous- and hypertrophy- associated genes Col type 1 and type X  
17 (*COL1A1*, *COL10A1*), *RUNX2* as well as the endogenous control ubiquitin C (*UBC*) were  
18 calculated using  $2^{-\Delta\Delta Cq}$ . The *UBC* housekeeping gene has been proven for stability in the  
19 present conditions. Two different controls MSC pellets and MSC embedded in THA-Col 1 at  
20 day 0 were used for the respective samples. Details on the primers and probe sequence as  
21 well as catalogue numbers of Assay-on-Demand (Applied Biosystems) are listed in  
22 supplementary (Tab A1).

23

## 24 2.12 Quantification of Glycosaminoglycans (GAG) and DNA

25 To quantify GAGs and DNA within MSC pellets and cell free and cell laden THA-Col 1  
26 hydrogels (n=3 samples/group and time point), samples were digested with Proteinase K  
27 (0.5 mg/ml, Sigma Aldrich) at 56°C. DNA content was measured in duplicates using Quant-  
28 iT™ PicoGreen (Invitrogen) assay according to the manufacturer's instructions. Fluorescence

1 was measured with a plate reader (Tecan infinite 200 PRO, Tecan) at 485 nm excitation and  
2 535 nm emission including a DNA standard curve. The amount of proteoglycans was  
3 determined in duplicates by dimethylene blue dye method with absorbance measurement at  
4 535 nm including a Chondroitin 4-sulfate sodium salt from bovine trachea (Fluka  
5 BioChemika) standard [30]. For calculation of GAGs released into media the cell free THA-  
6 Col 1 values were subtracted from the results of hMSC embedded in THA-Col 1.

7

## 8 2.13 Statistical Analysis

9 All samples were measured in technical duplicates of  $n = 2-4$  biological replicates per group  
10 and time point and displayed as box plot including mean value or as mean values with  
11 standard deviation. Statistical analysis was performed with Graph Pad Prism (Prism 8, USA).  
12 Cell migration length and migration area as well as PCR data was analyzed with multiple t-  
13 test. Values of the three sample groups (THA, Col 1 and THA-Col 1) were compared at three  
14 time points (day 0, day 3 and day 8) and corrected for multiple comparisons using Holm-  
15 Sidak method. Normalization of GAG to DNA values were evaluated using two-way Anova  
16 (comparing means of each sample between day 0 and day 21 and between samples at the  
17 two time points) with Sidak post hoc test to correct for multiple comparisons. Statistical  
18 significance was assumed for  $p$ -values  $< 0.05$ .

## 19 3 Results

### 20 3.1 Morphology and mechanical properties of the composite network.

21 THA-Col 1 composites were prepared dispersing Col 1 into THA, with fibrillogenesis induced  
22 by the pH rise and THA crosslinking triggered by  $H_2O_2$  addition and incubation at  $37^\circ C$ . The  
23 presence of Col 1 fibers in THA-Col 1 composite hydrogels was characterized by three  
24 independent techniques: SHG imaging, confocal microscopy, and turbidimetry (Fig. 2).

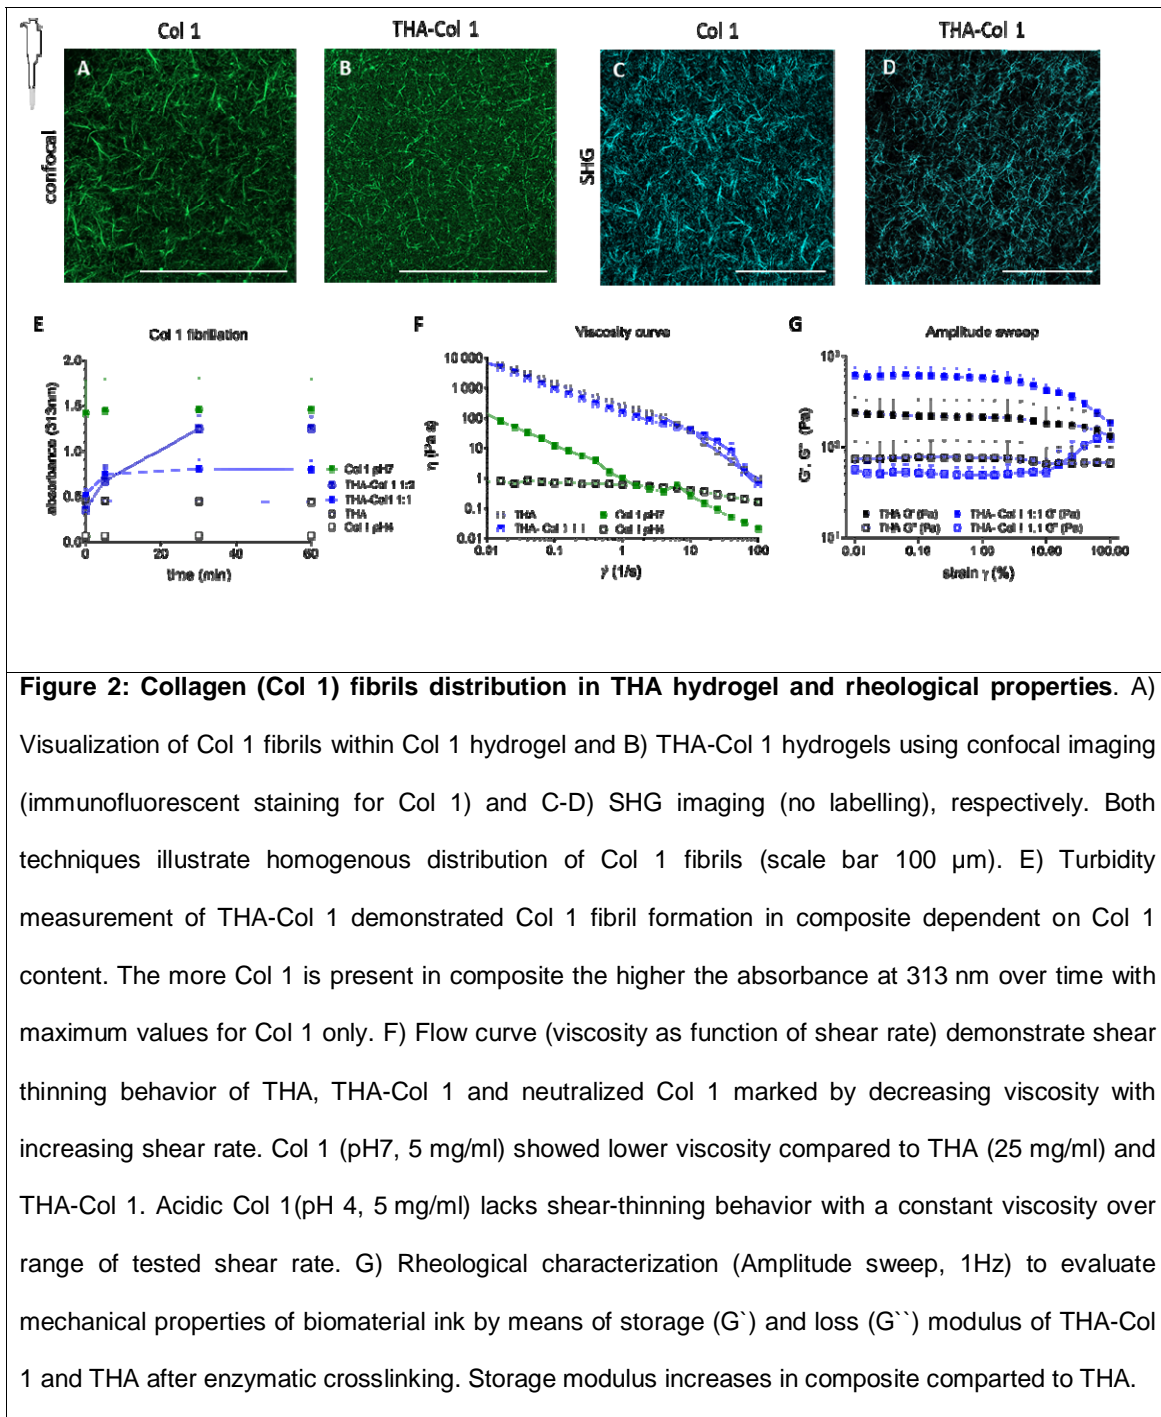

1

2

3 As positive control Col 1 hydrogel was included for all measurements. The turbidity  
 4 measurement allowed evaluating the fibrillogenesis kinetics (Fig. 2 E). An increase in  
 5 absorbance (313 nm) over time was observed ranging from 0.4 to 0.8 for THA 1:1 Col 1 and  
 6 from 0.06 to 1.3 for THA 1:2 Col 1, indicative of Col 1 fibrillation within the composite. The

1 maximum absorbance values increased with the Col 1 content within the materials, with the  
2 highest values around 1.5 absorbance units for the neutralized Col 1 positive control, which  
3 was fibrillar from the beginning of the measurement. After 30 minutes of incubation at 37°C a  
4 plateau was reached for all groups. Pure Col 1 in acidic and in neutralized solution, and THA  
5 showed constant values in turbidity assay without change in absorbance values over time.

6 The fibrillation of Col 1 was further corroborated by imaging techniques. Both, SHG imaging  
7 (Fig. 2 C and D) and confocal microscopy of Col 1 immunofluorescent stained samples (Fig.  
8 2 A and B), showed obvious presence of Col 1 fibers with a homogenous distribution within  
9 THA. Fiber morphology was visibly different, with a thinner and a denser fiber network in  
10 THA-Col 1 compared to Col 1 control. Quantification of fibril size and distribution was not  
11 possible since the fibrils cross different focal planes resulting in non-reliable values. Images  
12 acquired with confocal and SHG microscopy illustrate identical trend in fibrillar  
13 characteristics.

14 HRP concentration, H<sub>2</sub>O<sub>2</sub> content and mixing ratios of THA and Col 1 were selected based  
15 on the requirements for rheological properties and extrudability of the biomaterial ink and Col  
16 1 fibrillogenesis. The viscosity curve clearly demonstrated the shear thinning behavior of the  
17 biomaterial ink with an overall higher viscosity of 7 kPa·s for THA-Col 1 and 6 kPa·s for THA  
18 at 0.01 1/s, and monotonic decrease for increasing shear rates. At a shear rate higher than  
19 50 1/s the viscosity of THA-Col 1 fell below the value for THA. Neutralized Col 1 (5 mg/ml)  
20 viscosity was overall lower, ranging from 0.13 kPa·s at 0.01 1/s to 1 Pa·s at 1 1/s. Acidic Col  
21 1 (pH=4) showed an evident reduction in shear-thinning with viscosity ranging from 0.8 Pa·s  
22 to 0.6 Pa·s. Therefore, THA-Col 1 retained the shear thinning behavior required for the  
23 biomaterial ink extrusion. An increase in storage modulus was observed in the THA-Col 1  
24 composite hydrogel compared to THA (both samples were prepared at the same THA  
25 concentration for matching the concentrations of the enzymatic crosslinking agents, Fig. 2  
26 G).

27 The amplitude sweep showed similar profile for THA and THA-Col 1, with the Col 1 presence  
28 implicating an increase in storage modulus from 220 Pa to 608 Pa at 0.1% strain, but similar



- 1 decrease trend at higher strain (Fig. 2 G). This behavior is indicative that THA viscoelastic
- 2 properties are not disrupted by the formation of the composite with Col 1.

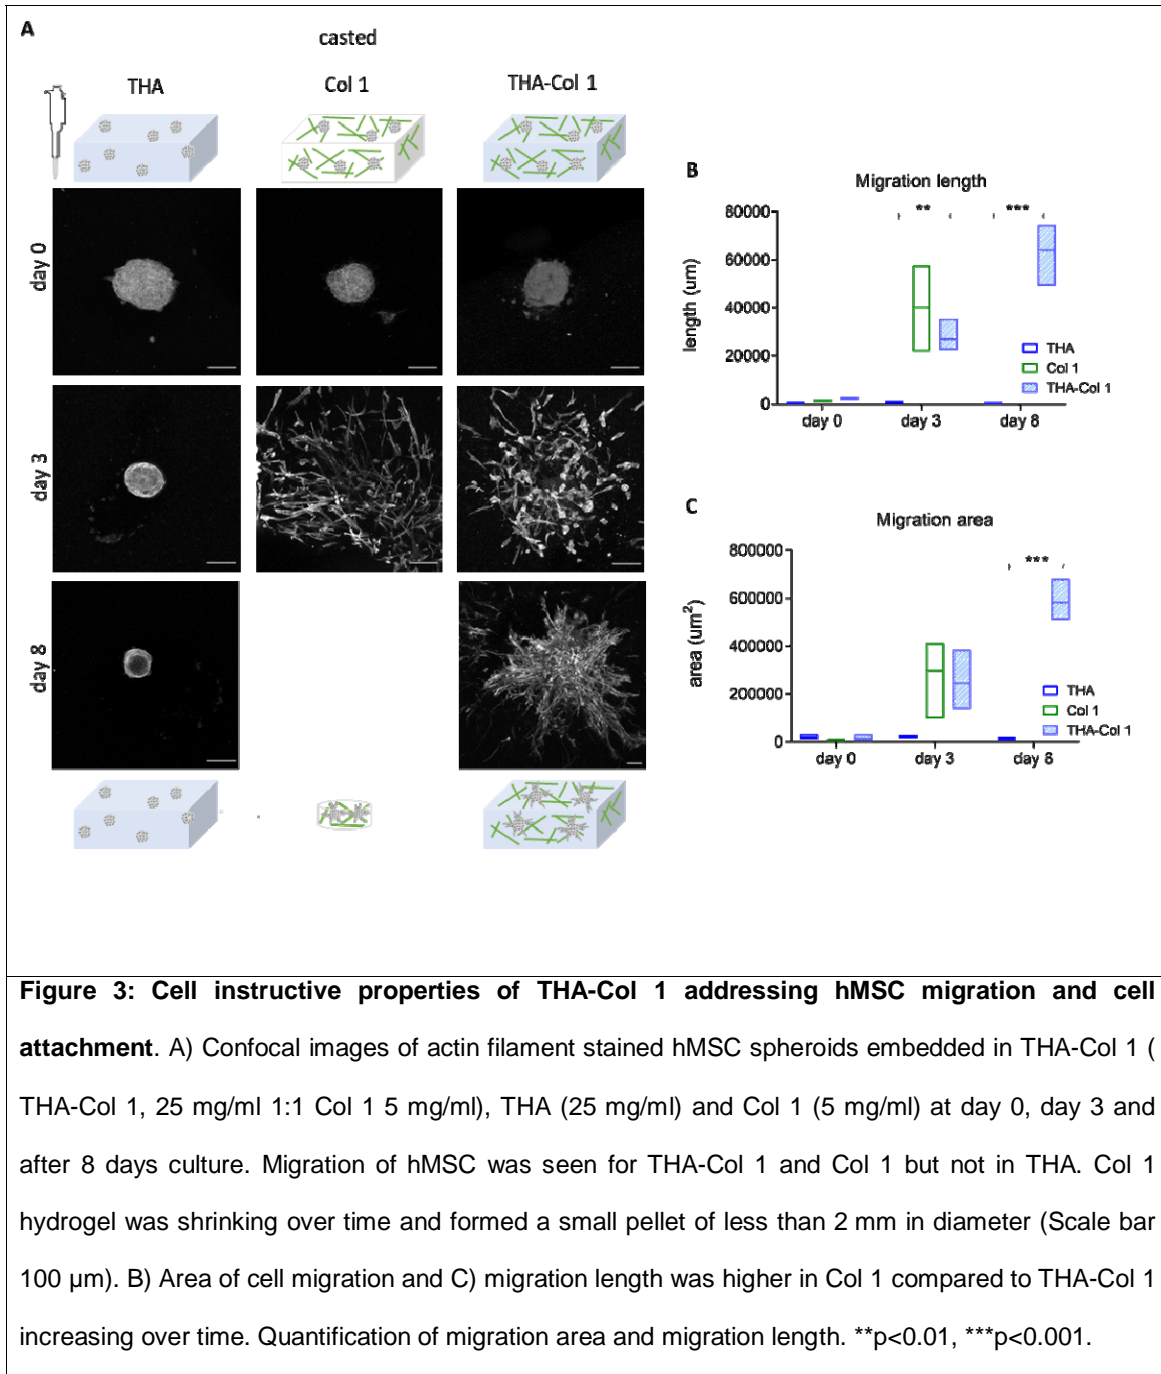

3

### 4 3.2 Cell instructive properties of THA-Col 1 bioink

5 hMSCs spheroids were embedded into bioink made of THA-Col 1 and into its single  
6 components to determine how the composition influences cell attachment and sprouting from

1 the spheroids. Fig. 3 A illustrates a panel of MAX projection images stained for actin  
2 filaments on day 0, day 3 and day 8. Cells migrated out of the uniformly dispersed spheroids  
3 into the biomaterials in presence of Col 1 (THA-Col 1 and Col 1), whereas no migration was  
4 observed in THA hydrogels.  
5 Migration length and migration area were quantified with the ImageJ sprout Morphology Tool  
6 on MAX projections images stained with phalloidin. Mean values for both parameters confirm  
7 the highest migration in Col 1 (migration length: 40165  $\mu\text{m}$ ; migration area: 297  $\mu\text{m}^2$ ),  
8 followed by THA-Col 1 (migration length: 26964  $\mu\text{m}$ ,  $p=0.0050$  compared to THA day 3;  
9 migration area: 246  $\mu\text{m}^2$ ,  $p=0.0720$  compared to THA day 3) on day 3. From day 3 to day 8  
10 the migration increased further for Col 1 and THA-Col 1 (THA-Col 1 migration length:  
11 63838  $\mu\text{m}$ ,  $p=0.0005$  compared to THA day 8; migration area: 582  $\mu\text{m}^2$ ,  $p=0.0001$  compared  
12 to THA day 8). In THA, migration area and migration length of hMSC spheroids remained  
13 unvaried for the whole duration of the experiment. Due to significant shrinkage of Col  
14 1 hydrogels the quantification of the two parameters on day 8 was not possible for for Col 1  
15 (Fig. 3 B-C). The differences in spheroid size derived from the variation in focus plane within  
16 the 3D constructs.

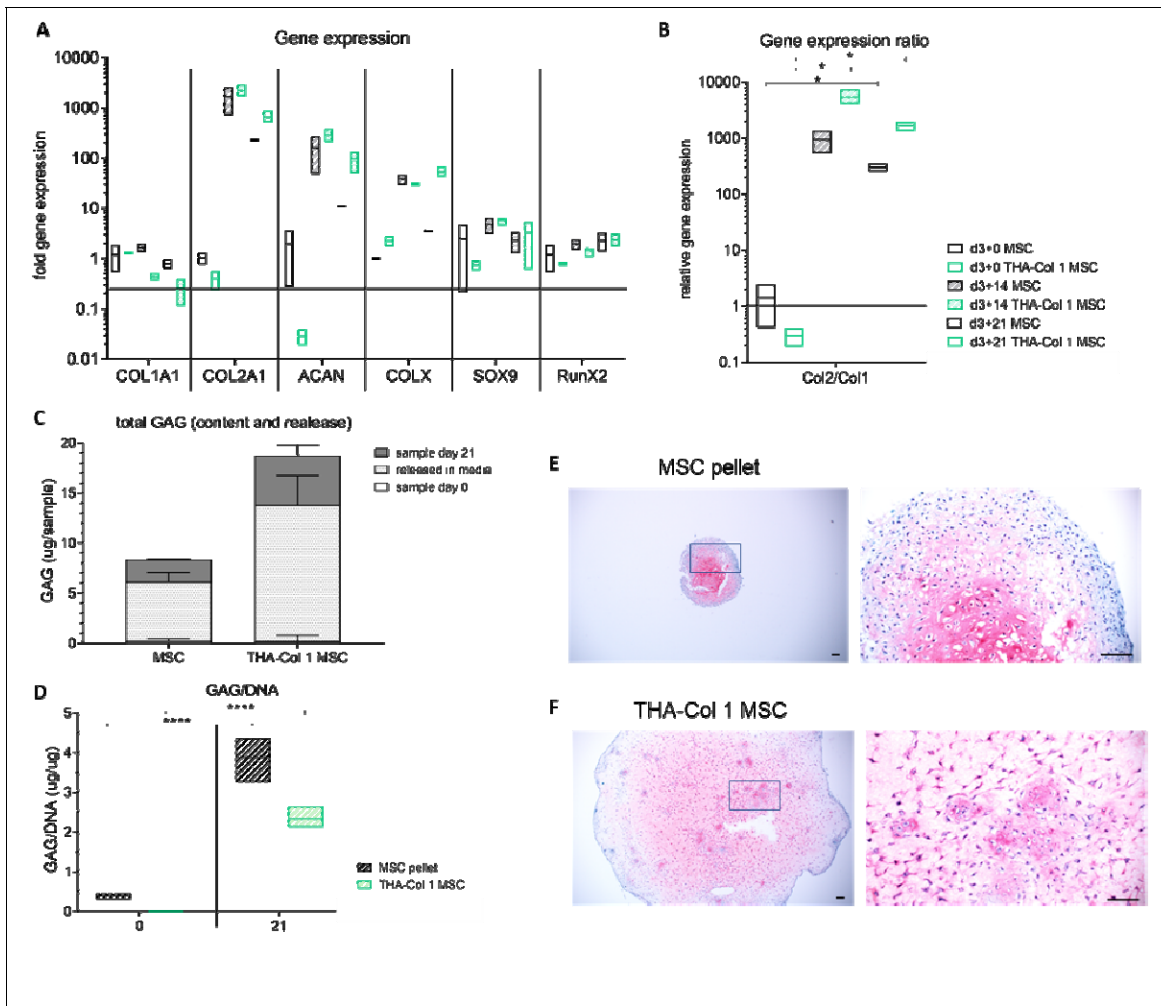

**Figure 4: Chondrogenic differentiation potential of hMSC embedded in THA-Col 1 compared to hMSC pellet culture.** A) Gene expression analysis relative to hMSC pellet or hMSC embedded in THA-Col 1 hydrogel (TC MSC) control at day 0 for Col 1 (COL 1A1), Col II (COL 2A1), aggrecan (ACAN), SOX9 and RunX2. Increase in all chondrogenic related genes with minor changes for SOX9 and RunnX2. B) Relative gene expression ratio of Col 2 to Col 1 at day 21. No statistical differences resulted for all PCR data shown beside for Col2/Col 1 ratio. \* $p < 0.05$  C) Quantification of proteoglycans (GAG/sample) including total amount of GAGs released into the media supernatant and GAGs retained in the sample at day 21. D) GAG/DNA increased over time from day 0 to day 21 for MSC pellet and THA-Col 1 MSC. \*\*\*\*  $p < 0.0001$ . E) Safranin O staining to visualize proteoglycans in ECM after 21 days in vitro culture at two magnifications for MSC pellet and F) MSC embedded in THA-Col 1 hydrogel (THA-Col 1 MSC) (scale bar 100  $\mu\text{m}$ ).

### 1 3.3 In vitro chondrogenic differentiation

2 Chondrogenic differentiation potential of hMSC spheroids embedded in isotropic THA-Col 1  
3 was compared to hMSC pellet culture as positive control, and was evaluated by qPCR,  
4 safranin-O staining and total GAG/DNA content. Gene expression analysis of hMSCs  
5 spheroid embedded in THA-Col 1 (Fig. 4 A) showed an increase in chondrogenic related  
6 markers *COL2A1* (1,000-10,000 fold), *ACAN* (10-1,000 fold) and *SOX9* (<20 fold) over time,  
7 similarly to hMSCs pellet. *COL1A1* was slightly down regulated (0.1 – 1.0-fold), while  
8 *COL10A1* showed an increase of up to 100 times for the two groups at day 14. At day 21,  
9 *COL10A1* stayed constant for hMSC embedded THA-Col 1 whereas the fold change relative  
10 to control sample decreased to <10 for hMSCs pellet. *RUNX2* upregulation was much less  
11 pronounced (< 10-fold change) compared to the extracellular matrix associated genes. The  
12 ratio *COL2A1/COL1A1* (Fig. 4 B), was higher for hMSC spheroids embedded in THA-Col 1  
13 (day 14:  $5353 \pm 1699$ ,  $p= 0.0242$  compared to day 0 , day 21:  $1650 \pm 409$ ,  $p=0.0293$   
14 compared to day 0) compared to hMSCs pellet (day 14:  $931 \pm 568$   $p= 0.1467$  compared to  
15 day 0, day 21:  $300 \pm 69$   $p= 0.0260$  compared to day 0).

16 At day 21, an increase in proteoglycans resulted for both groups (Fig. 4 C-D). Total amount  
17 of GAGs increased from  $0.46 \pm 0.38$  ug/ml to  $4.48 \pm 0.13$  ug/ml ( $p<0.0001$ ) for hMSCs pellet  
18 and from  $1.18 \pm 0.20$  ug/ml to  $4.48 \pm 0.69$  ug/ml ( $p<0.0001$ ) for hMSCs spheroids embedded  
19 in the bioink. Release of proteoglycans in the media was  $5.88 \pm 0.92$   $\mu$ g and  $13.58 \pm 2.93$   $\mu$ g,  
20 respectively. Both groups retained around 25% of the total produced proteoglycans within the  
21 sample (MSC pellet 26.8%, THA-Col 1 MSC 23.3%). Normalizing total GAG to DNA values  
22 in the samples increased for hMSCs pellet within 21 days to  $3.88 \pm 0.42$  ( $p<0.0001$ ) and for  
23 hMSCs embedded in THA-Col 1 to  $2.34 \pm 0.24$  ( $p<0.0001$ ).

24 The histological staining confirmed the chondrogenic differentiation. After 21 days of culture  
25 a homogenous distribution of safranin O positive staining was observed for hMSCs pellet and  
26 hMSC embedded in THA-Col 1 (Fig. 4 E-F). The hMSC spheroids were no longer visible in  
27 the point of initial seeding because of the migration throughout the whole hydrogel, resulting  
28 in a homogenous cell distribution. hMSCs morphology was comparable between the cells in

1 the pellet and the cells embedded in the hydrogel; most cells appeared to be condensed or  
2 rounded with a low population of spindle shaped cells at day 21.

3 Overall, this experiment pointed out that hMSC embedded in the isotropic THA-Col 1 bioink  
4 is permissive to cell migration, GAG retention and that it retains the same chondrogenic  
5 potential as the gold standard pellet culture.

6

### 7 3.4 3DP to fabricate microscopically anisotropic scaffolds

8 After optimizing THA-Col 1 biomaterial ink, the Col 1 presence and fibrillar orientation were  
9 characterized. SHG imaging and confocal microscopy were used to visualize the Col 1 fibrils  
10 in the THA-Col 1 biomaterial ink after extrusion printing. The fibrillar structure of Col 1 in the  
11 composite was preserved after printing and resulted in an anisotropic material.  
12 Representative microscopic images in Fig. 5 A and C clearly demonstrate the presence of  
13 parallel aligned Col 1 fibers along the direction of the printing.

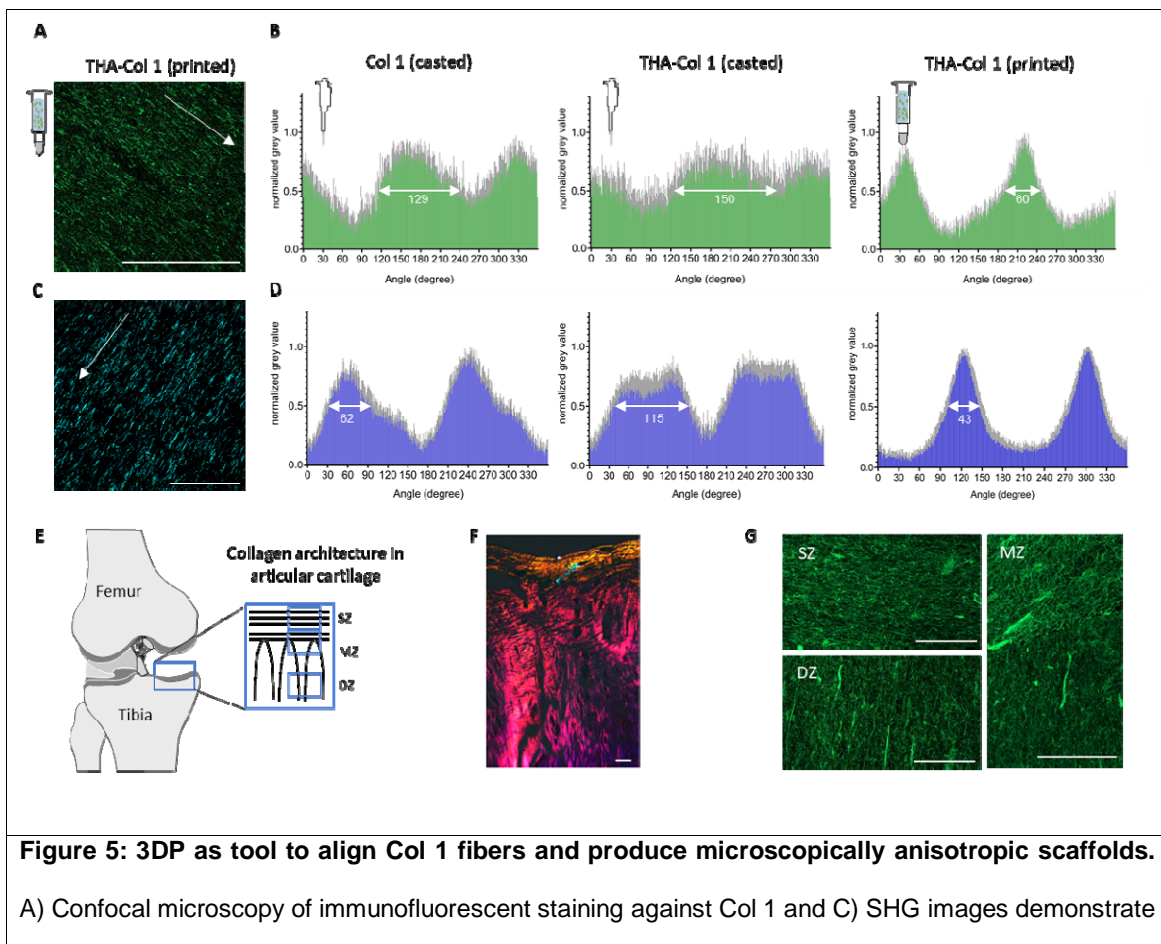

anisotropic fibers in THA-Col 1 biomaterial ink (scale bar 100  $\mu\text{m}$ ). Unidirectional orientation of parallel Col 1 fibers aligning along the printing direction (white arrow indicated printing direction). B, D) Bar diagrams (mean values  $\pm$  standard deviation) display the quantification of fiber alignment in casted Col 1, casted THA-Col 1 (ID 1.0 mm) and printed THA-Col 1 (15G: ID 1.36 mm, 0.25" cylindrical needle) from images acquired either with confocal microscope (B, green) or SHG (D, blue). Independently of microscopical method the printed THA-Col 1 samples resulted in unidirectional orientation which was more random for casted THA-Col 1 and Col 1. White arrow in the bar diagram indicate the peak width at a normalized grey value of 0.5. E) Schematic illustration of Col 1 fiber alignment in articular cartilage. F) Polarized light image of articular cartilage illustrating horizontal fibers in superficial zone (SZ) and vertical orientation in deep zone (DZ) (scale bar 50  $\mu\text{m}$ ). G) Confocal images of immunofluorescent labelled Col 1 mimicking hierarchical fiber orientation in articular cartilage with parallel horizontal fibers in the SZ, more isotropic fibers in the middle zone (MZ) and parallel vertical fibers in the DZ (scale bar 50  $\mu\text{m}$ ).

1

2 To further characterize this property, the ImageJ Oval plug in was used to quantify the  
3 alignment of THA-Col 1 after printing and compare to casted THA-Col 1 and casted Col 1.  
4 Casted THA-Col 1 resulted in the least anisotropic properties, followed by casted Col 1.  
5 Comparing the peak width of the preferred orientation in the printed samples at normalized  
6 grey value of 0.5 (SHG: 43 degree, confocal microscopy: 60 degree) to the corresponding  
7 casted one (SHG: 115 degree, confocal microscopy: 150 degree) and the casted Col 1  
8 (SHG: 62 degree, confocal microscopy: 129 degree) a clear narrowing of the Col 1 fiber  
9 orientation dispersity was observed for the printed sample (Fig. 5 B and D).

10 The control over the parallel fiber orientation was used to produce a construct imitating the  
11 Col orientation in knee articular cartilage. Fibrillar structure in the superficial zone (SZ at the  
12 surface) was realized by printing parallel lines, whereas the Middle (MZ) and deep zone (DZ)  
13 by an arch like geometry shown in Fig. 5 E and G with an overall sample size of 1.4 x 1.6 cm.  
14 Immunofluorescent staining against Col 1 clearly shows the fibrillar alignment in the three  
15 zones with horizontal fibers in the SZ, vertical alignment in the DZ and more isotropic  
16 appearance in the MZ.

1

### 2 3.5 Effect of 3DP on cell migration in THA-Col 1 bioink

3 After characterization of the material microstructure and properties, we investigated the  
4 response of hMSCs on aligned anisotropic versus isotropic fibers in the THA-Col 1. The  
5 bioink was either printed with a cylindrical needle or extruded from the cartridge without  
6 needle attached and compared to casted samples. Live/dead staining of hMSC aggregates  
7 embedded in THA-Col 1 (printed versus casted) are shown in Fig. 6 A at day 1 and day 6.  
8 Cells were viable after printing and remained viable over culture time. At day 1, some dead  
9 cells (stained in red) were visible mainly in the center of the spheroids. After 6 days, less  
10 dead cells were present compared to day 1 in all three groups. The live/dead staining also  
11 showed no toxic effect of the addition of H<sub>2</sub>O<sub>2</sub> (0.39 mM) in THA and THA-Col 1 to initiate  
12 enzymatic gelation.

13 During *in vitro* culture, hMSC migrated from the spheroids in all three groups. Observing the  
14 cytoskeleton orientation via phalloidin staining, MSCs alignment was more pronounced in the  
15 printed groups, while hMSC showed a more isotropic cytoskeletal orientation in the extruded  
16 and casted group. The overlay image of actin filament staining (red), and cell nuclei (blue)  
17 demonstrated the unidirectional migration of the cells (Fig. 6 B).

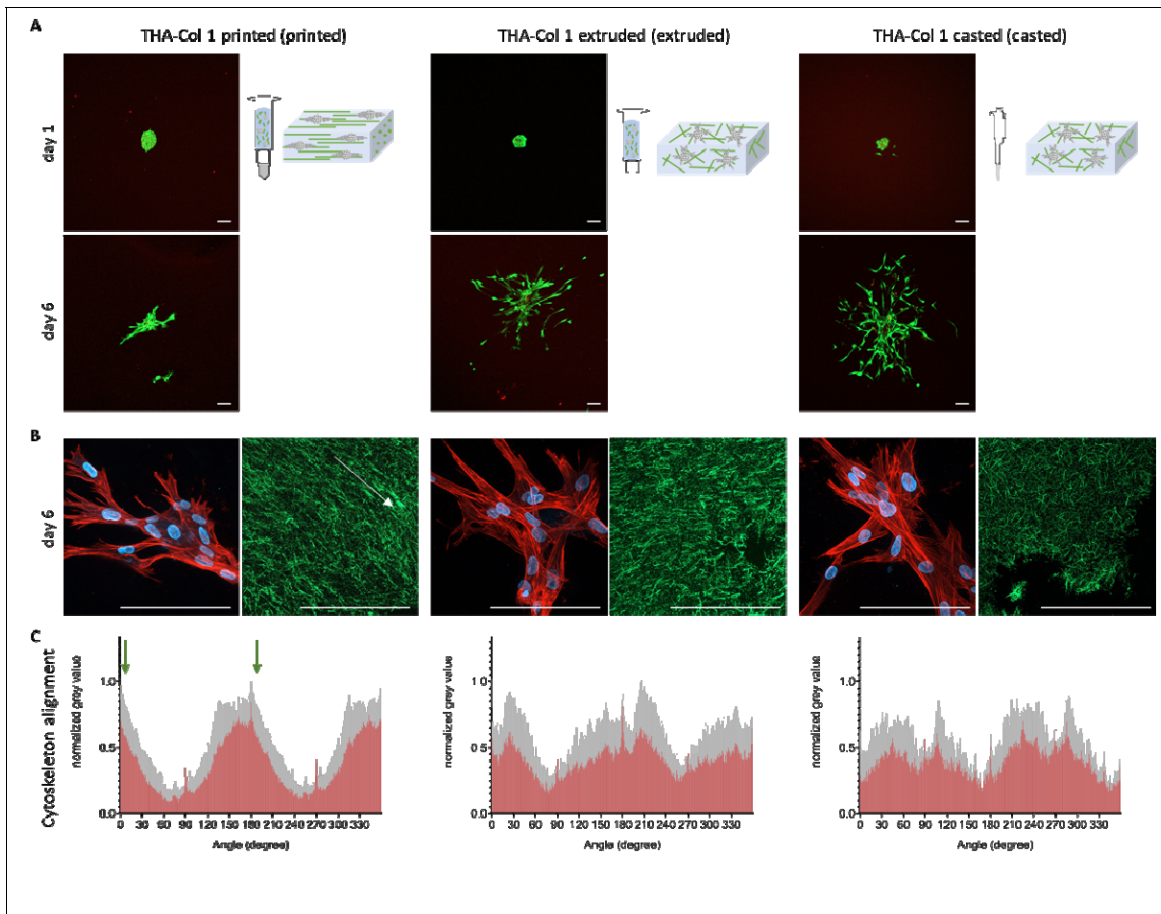

**Figure 6: Viability (Live/dead staining) and phalloidin staining of hMSC spheroids in THA-Col 1 hydrogel.** A) Representative images of live/dead staining at day 1 and day 6 showing living cells in green with few dead cells in red (Scale bar 100  $\mu$ m). Bio-ink was either printed with 15G (ID 1.36 mm) cylindrical needle, extruded from 3CC cartridge (ID 2.4 mm) or pipetted with CP100 positive displacement pipette (ID 1.0 mm). B) MAX z-projection of hMSCs after 6 days of culture in THA-Col 1 demonstrating unidirectional actin filaments/cell cytoskeleton (in red) along the Col 1 (green) direction of printed samples (white arrow indicates printing direction) and cell nuclei (blue). In extruded and casted samples cells migrated random in the bioink (scale bar 100  $\mu$ m). C) Orientation of cytoskeleton of hMSCs embedded in THA-Col 1 printed, extruded and casted displaying the mean values in red with standard deviation in grey. More unidirectional alignment with smaller peak width of cytoskeleton resulted for 15G printed THA-Col 1 compared to the two other groups. Green arrow in the graph of printed sample indicates the printing direction.

1

2



1 Fig. 6 C illustrates the orientation of the cytoskeleton based on MAX projection of the red  
2 channel. The group printed with a 15G needle (left) displays two clear maxima along the  
3 orientation of the Col fibers determined by the printing direction (and the 180° from it),  
4 indicated by the green arrows, thus indicating cytoskeleton alignment along the Col fibers.  
5 For the group undergoing extrusion without needle (2.4mm diameter, center) the peaks were  
6 markedly broadened and more jagged, indicative of a more random distribution; this trend  
7 was even more apparent for the casted sample, where the distribution assumes a white  
8 noise profile.

9

## 10 4 Discussion

11 Extrusion-based printing has achieved significant advances in controlling construct  
12 resolution, composition and shape. However, control over the microscopic architecture has  
13 been mostly overlooked. Mechanical and biological properties of animal tissues depend not  
14 only on the chemical composition, but also on the specific spatial arrangement of structural  
15 molecules and biological factors [10]. For example, cartilage is composed of a  
16 glycosaminoglycan-based matrix containing Col 1 fibers with specific orientation, parallel to  
17 the surface on the superficial zone and perpendicular in deeper layers [31].

18 In the present work, we propose a technique to introduce anisotropic properties into a THA-  
19 Col 1 composite biomaterial. Having two parallel occurring crosslinking mechanisms, we  
20 overcame the difficulty in homogenous mixing Col 1 fibrils into a viscoelastic HA-based  
21 matrix by combining a previously developed bioink based on the tyramine derivative of HA  
22 [32] with acidic-solubilized Col 1, which was buffered upon mixing, thereby forming fibrils.  
23 Since both precursors, THA bioink and Col 1, are in liquid form, mixing to homogeneity was  
24 easily achieved, as visualized with microscopic techniques (Fig. 2 A-D). A distinctive  
25 advantage of the preparation method here illustrated is that THA crosslinking and Col 1 fibril  
26 formation occur simultaneously, thus avoiding phase separation [23]. Although the Col 1  
27 fibrils in the confocal and SHG images in Figure 2 seem to differ between pure Col 1 and

1 THA-Col 1, both casted, there is no difference in fiber diameter as shown by secondary  
2 electron and transmission electron microscopy previously [33]. The visual differences can be  
3 explained by the MAX projection of several focus plans within the 3D constructs and thus  
4 fibers in the deeper regions tend to display smaller fibrils compared to the fibrils captured in  
5 z-directions closer to the objective.

6 The preservation of the fibrillar microstructure of low concentrated neutral Col 1 (2.5 mg/ml  
7 final concentration in composite) within THA (12.5 mg/ml final concentration) after 3DP is a  
8 further feature allowing to produce the anisotropic microstructure.

9 Casted Col 1 hydrogels have been extensively used in the literature, but the fibrillar structure  
10 was not extensively investigated when combined with a second polymer. Binner *et al.*  
11 characterized a star shaped poly (ethylene glycol) hydrogel mixed with Fluorescein-  
12 isothiocyanate labelled Col 1. Besides a homogenous distribution of the Col 1, no fibrillar  
13 structure was shown and further characterized [34]. Formation of Col 1 fibers resulted to be  
14 dependent on the incubation time at 4°C prior to pH neutralization and thus inducing  
15 fibrillation when combined with Matrigel [35]. A thermally controlled printing of Col 1  
16 (6 mg/ml) blended with Pluronic (60% w/v) resulted in Col 1 fiber formation and aggregation  
17 with a dependency of the fiber alignment with the amount of media added and thus time to  
18 dissolve the Pluronic out of the blend [21].

19 The shear thinning and viscosity behavior of high concentration neutralized Col 1 (20-60  
20 mg/ml) has been characterized by different groups [20, 36]. In contrast, 3D printing of  
21 neutralized pure Col 1 at low concentrations is challenging due to the lack of shear thinning  
22 and shape retention. At the low concentration used in this study ( $\leq 5$  mg/ml), printability was  
23 rescued by the shear thinning THA. A similar approach was presented by Duarte Capos *et al.*  
24 using agarose as shear thinning component [37]. On the other hand, printing properties of  
25 THA previously investigated in our group were preserved upon mixing with Col 1 [38].

26 The addition of Col 1 to THA increased the storage modulus. Thus, the fibrillar network within  
27 the viscoelastic THA can be used as a design parameter to modulate the mechanical  
28 properties. The formation of di-tyramine bonds between Col 1 and THA could be one reason

1 for the synergistic effect [33, 39]. Other advantages of the composite are that the cell-  
2 mediated shrinking of Col 1 scaffolds is reduced; on the other side, Col 1 provides cell  
3 attachment sites to the HA, and an ECM-mimetic fibrillar matrix. Reduced shrinkage of Col 1  
4 was also observed when this natural material was combined with silk when pulmonary  
5 fibroblasts were embedded [39].

6 Within the casted gels the fibrils exhibited either random orientation or local domains with  
7 some degree of orientation, which could be attributed to the low but non-zero shear forces  
8 experienced during casting from a pipette.

9 After 3D printing of the composite, an overall alignment along the printing axis was observed,  
10 as expected. Therefore, the low-grade enzymatic crosslinking of the THA preserved at least  
11 in part the capability of the fibrils to comply with the shear stimulus when extruded.

12 Shear-induced alignment of fibrillar structures has been reported by different groups [22, 40].  
13 Kim *et al.* controlled the fiber alignment in dependence of the needle diameter during printing  
14 showing a higher degree of alignment when using 30G compared to 20G needles [40]. This  
15 intuitive behavior was not observed in the present study; rather, with thinner needles the  
16 fibrillar structure was disrupted, possibly due to the significantly higher pressure that was  
17 needed to achieve extrusion, potentially creating discontinuity or turbulence (supplementary  
18 Fig. A1). Moncal *et al.* introduced Col printing (6 mg/ml) with a thermally controlled set-up  
19 using Pluronic as sacrificial material and quantified the alignment of Col fibers along printing  
20 direction related to the amount of media and incubation time (0-48h) to induce fibrillation but  
21 with overall low anisotropy indices [21]. An agarose-Col (5 mg/ml agarose, 2 mg/ml Col 1)  
22 blend with equally distributed col fibers but no signs of alignment after printing was presented  
23 by Koepf *et al.* [41]. A different approach to align Col 1 fibers was shown by Betsch *et al.*  
24 They aligned iron nanoparticle loaded agarose-Col 1 biomaterial ink after exposure to a  
25 magnetic field. The alignment was most prevalent in Col 1 (3 mg/ml) compared to the  
26 composite (agarose 3 mg/ml, Col 1 2.5 mg/ml) only in the group with magnetic field exposure  
27 [42]. Yang *et al.* also used electrically assisted printing to mimic Col 1 orientation in meniscus  
28 by radial and circumferential aligned carbon nanotubes [43]. With the method here

1 presented, we achieved alignment of Col 1 fibrils within a composite using exclusively natural  
2 ECM molecules avoiding using synthetic non-degradable components simply by 3D  
3 extrusion printing. Col 1 only can evolve over time becoming isotropic. This behavior is  
4 prevented within the composite, due to the presence of gelled THA stabilizing Col 1 fibrils.  
5 The combination of the two ECM components brings biological features and directs cellular  
6 behavior. Single cell seeding resulted in enhanced adhesion, overcoming limited cell  
7 attachment reported before [38]. Similar results were observed with cell aggregates, where  
8 the presence of Col 1 increased the migration length and area. This behavior can be  
9 attributed to the presence of the integrin interaction site Arginine, Glycine and Aspartate,  
10 (RGD sequence) naturally contained in Col 1 inducing cell adhesion [44]. A direct correlation  
11 of cell adhesion and RGD density was shown also for electrospun HA functionalized with  
12 RGD peptide by Kim *et al.* [45]. The above cited agarose-Col blend has been shown to  
13 enhance smooth muscle cell spreading and attachment and thus confirming that the  
14 presence of Col 1 in a composite influences cell spreading [41].  
15 The local microstructure of the material but also fiber parameters regulate cell response [46,  
16 47]. In this study, hMSC migration was stimulated along the unidirectional orientation of the  
17 Col 1 fibers after 3D printing. Due to the interaction of hMSC with the Col 1 fibers, the original  
18 orientation of the parallel fiber alignment was less visible in confocal microscopy (Fig. 6 B).  
19 However, the overlapping direction of cytoskeleton orientation and fiber alignment were  
20 visualized and quantified (supplementary Fig. A2). In a comparable study, Kim *et al.* showed  
21 the unidirectional Actin filament orientation of keratinocytes embedded in corneal stroma-  
22 derived decellularized ECM after printing which were less pronounced in non-printed  
23 samples for preparation of corneal implants [40]. Yang *et al.* reported an increase in tendon  
24 associated genes of rat MSC with oriented Col 1 fiber membrane compared to the isotropic  
25 sample [48]. Whether this observation relies on the anisotropic properties or is partially  
26 induced by the shear stress during printing is not fully understood.  
27 HA has been attributed a plethora of biological properties, including inducing cell  
28 proliferation, chondrogenic differentiation and matrix synthesis [49, 50]. The THA-Col 1

1 composite here proposed supported the migration and chondrogenic differentiation of hMSC  
2 spheroids, resulting in cartilage like matrix deposition throughout the whole hydrogel. Matrix  
3 deposition was uniform, with staining comparable to the standard pellet culture control (Fig. 4  
4 E-F). Importantly, despite Col 1 presence and invasion of the whole matrix, cell morphology  
5 was also comparable to the pellet culture, showing a more condensed rather than spindle  
6 shape morphology. The biomaterial used in this study overcomes the limitation of  
7 extracellular matrix deposition only in the pericellular region which is attributed to many  
8 seminatural materials used for cartilage tissue engineering.

9 One possible concern regarding cartilage regeneration is the use of Col type 1 instead of  
10 type 2 for our bioink. Clinical studies of a cell free type 1 Col hydrogel (CaReS-1S<sup>®</sup>, Arthro  
11 Kinetics AG) implanted in focal, full layer cartilage defects have shown good clinical outcome  
12 addressing defect filling and homogenous structure of the repair tissue [51], with the Col 1  
13 disappearing *in vivo* to leave space to the cell-deposited Col 2 [52]. In a minipig study  
14 colonization of the cell free Col 1 matrix gave outcome comparable to matrix assisted  
15 chondrocyte implantation [53, 54]. Jiang *et al.* demonstrated superior chondrogenic  
16 differentiation of MSC embedded in Col 1 compared to MSC only in a rat model [55]. On the  
17 other hand, HA has been combined with Col 1 or gelatin before with similar outcomes that  
18 chondrogenic differentiation is promoted in the composite compared to HA or Col 1 only [56-  
19 58].

20 One limitation of the present technique is the shear-induce alignment, limiting the degrees of  
21 spatial freedom in fibril arrangement. Another limitation is the missing quantification of the  
22 Col 1 fibers within the composite compared to Col 1 hydrogel. This was due to technical  
23 limitations in visualizing Col 1 fibrils crossing different focus planes within a 3D hydrogel and  
24 thus dealing with autofluorescence, light scattering and the opaque character of the hydrogel.  
25 For further development, the capacity of regenerating cartilage or other tissues should be  
26 tested interrogating specifically the effect of the orientation separately from the composition,  
27 comparing random oriented or non-fibrillar constructs with aligned constructs.

28

## 1 5 Conclusions

2 Overall, in this work, we have presented a method to obtain an THA-Col 1 composite with  
3 macroscopic homogeneity and microscopic heterogeneity mimicking the macromolecular  
4 architecture of native tissues. We achieved a uniform distribution of Col 1 fibers within an  
5 HA-based viscoelastic matrix starting from liquid precursors with simultaneous Col 1  
6 fibrillation and HA crosslinking. The orientation of the Col 1 fibers in the 3D printed construct  
7 was controlled with the shear stress during printing and had a direct impact on cell behavior.  
8 The biomaterial ink here introduced can be extended to other fibrillar proteins to produce  
9 similar microstructural features. The possibility of printing ECM components with control over  
10 microscopic alignment brings biofabrication one step closer to capturing the complexity of  
11 biological tissues.

12

## 13 Author contribution

14 **Andrea Schwab**: Conceptualization, Methodology, Software, Validation, Formal analysis,  
15 Investigation, Data Curation, Writing-Original Draft. **Christophe H elary**: Conceptualization,  
16 Review and Editing. **Geoff Richards**: Review and Editing, Funding acquisition. **Mauro Alini**:  
17 Conceptualization, Review and Editing, Funding acquisition. **David Eglin**: Review and  
18 Editing, Project administration, Funding acquisition. **Matteo D'Este**: Conceptualization,  
19 Writing-Review and Editing, Supervision, Project administration, Funding acquisition.

20

## 21 Declaration of competing interests

22 The authors declare that they have no known competing financial interests or personal  
23 relationships that could have appeared to influence the work reported in this paper.

24

## 25 Data availability

1 The processed data required to reproduce these findings are available to download from  
2 Mendeley-Data link <http://dx.doi.org/10.17632/vcxdk7s8jy.2> .

3

## 4 Acknowledgements

5 This work is part of the osteochondral defect collaborative research program supported by  
6 the AO foundation.

7 This project has been partially supported by "L'Agence Nationale de la Recherche" (ANR)  
8 and the Swiss National Science Foundation (SNSF): INDEED project, SNSF's grant number  
9 310030E\_189310 and ANR's grant number ANR-19-CE06-0028.

10 The authors acknowledge support of the Scientific Center for Optical and Electron  
11 Microscopy ScopeM of the Swiss Federal Institute of Technology ETHZ for acquiring SHG  
12 images.

13 The Graubünden Innovationsstiftung is acknowledged for its financial support.

14 The authors thank Dr. Christoph Sprecher for his support with confocal microscopy settings  
15 and Luca Ambrosio MD for his support setting up the turbidity measurement.

16

## 17 References

18 [1] S.V. Murphy, A. Atala, 3D bioprinting of tissues and organs, *Nat Biotechnol* 32(8) (2014)  
19 773-85. <https://doi.org/10.1038/nbt.2958>.

20 [2] M. Hospodiuk, M. Dey, D. Sosnoski, I.T. Ozbolat, The bioink: A comprehensive review on  
21 bioprintable materials, *Biotechnol Adv* 35(2) (2017) 217-239.  
22 <https://doi.org/10.1016/j.biotechadv.2016.12.006>.

23 [3] F.P.W. Melchels, W.J.A. Dhert, D.W. Hutmacher, J. Malda, Development and  
24 characterisation of a new bioink for additive tissue manufacturing, *J Mater Chem B* 2(16)  
25 (2014) 2282. <https://doi.org/10.1039/c3tb21280g>.

- 1 [4] J. Malda, J. Visser, F.P. Melchels, T. Jungst, W.E. Hennink, W.J. Dhert, J. Groll, D.W.  
2 Hutmacher, 25th anniversary article: Engineering hydrogels for biofabrication, *Adv Mater*  
3 25(36) (2013) 5011-28. <https://doi.org/10.1002/adma.201302042>.
- 4 [5] A.K. Miri, I. Mirzaee, S. Hassan, S. Mesbah Oskui, D. Nieto, A. Khademhosseini, Y.S.  
5 Zhang, Effective bioprinting resolution in tissue model fabrication, *Lab Chip* 19(11) (2019)  
6 2019-2037. <https://doi.org/10.1039/c8lc01037d>.
- 7 [6] S.M. Bittner, B.T. Smith, L. Diaz-Gomez, C.D. Hudgins, A.J. Melchiorri, D.W. Scott, J.P.  
8 Fisher, A.G. Mikos, Fabrication and mechanical characterization of 3D printed vertical  
9 uniform and gradient scaffolds for bone and osteochondral tissue engineering, *Acta Biomater*  
10 90 (2019) 37-48. <https://doi.org/10.1016/j.actbio.2019.03.041>.
- 11 [7] T.J. Klein, S.C. Rizzi, J.C. Reichert, N. Georgi, J. Malda, W. Schuurman, R.W. Crawford,  
12 D.W. Hutmacher, Strategies for zonal cartilage repair using hydrogels, *Macromol Biosci*  
13 9(11) (2009) 1049-58. <https://doi.org/10.1002/mabi.200900176>.
- 14 [8] L.H. Nguyen, A.K. Kudva, N.S. Saxena, K. Roy, Engineering articular cartilage with  
15 spatially-varying matrix composition and mechanical properties from a single stem cell  
16 population using a multi-layered hydrogel, *Biomaterials* 32(29) (2011) 6946-52.  
17 <https://doi.org/10.1016/j.biomaterials.2011.06.014>.
- 18 [9] M.A. Heinrich, W. Liu, A. Jimenez, J. Yang, A. Akpek, X. Liu, Q. Pi, X. Mu, N. Hu, R.M.  
19 Schiffelers, J. Prakash, J. Xie, Y.S. Zhang, 3D Bioprinting: from Benches to Translational  
20 Applications, *Small* 15(23) (2019) e1805510. <https://doi.org/10.1002/sml.201805510>.
- 21 [10] P. Datta, V. Vyas, S. Dhara, A.R. Chowdhury, A. Barui, Anisotropy Properties of  
22 Tissues: A Basis for Fabrication of Biomimetic Anisotropic Scaffolds for Tissue Engineering,  
23 *Journal of Bionic Engineering* 16(5) (2019) 842-868. [https://doi.org/10.1007/s42235-019-](https://doi.org/10.1007/s42235-019-0101-9)  
24 0101-9.
- 25 [11] M.D. Shoulders, R.T. Raines, Collagen structure and stability, *Annu Rev Biochem* 78  
26 (2009) 929-58. <https://doi.org/10.1146/annurev.biochem.77.032207.120833>.



- 1 [12] A. Malandrino, X. Trepap, R.D. Kamm, M. Mak, Dynamic filopodial forces induce  
2 accumulation, damage, and plastic remodeling of 3D extracellular matrices, PLoS Comput  
3 Biol 15(4) (2019) e1006684. <https://doi.org/10.1371/journal.pcbi.1006684>.
- 4 [13] A.D. Doyle, K.M. Yamada, Mechanosensing via cell-matrix adhesions in 3D  
5 microenvironments, Exp Cell Res 343(1) (2016) 60-66.  
6 <https://doi.org/10.1016/j.yexcr.2015.10.033>.
- 7 [14] W.M. Han, S.J. Heo, T.P. Driscoll, J.F. Delucca, C.M. McLeod, L.J. Smith, R.L. Duncan,  
8 R.L. Mauck, D.M. Elliott, Microstructural heterogeneity directs micromechanics and  
9 mechanobiology in native and engineered fibrocartilage, Nat Mater 15(4) (2016) 477-84.  
10 <https://doi.org/10.1038/nmat4520>.
- 11 [15] B. Patel, Z. Xu, C.B. Pinnock, L.S. Kabbani, M.T. Lam, Self-assembled Collagen-Fibrin  
12 Hydrogel Reinforces Tissue Engineered Adventitia Vessels Seeded with Human Fibroblasts,  
13 Sci Rep 8(1) (2018) 3294. <https://doi.org/10.1038/s41598-018-21681-7>.
- 14 [16] A.S. Gladman, E.A. Matsumoto, R.G. Nuzzo, L. Mahadevan, J.A. Lewis, Biomimetic 4D  
15 printing, Nat Mater 15(4) (2016) 413-8. <https://doi.org/10.1038/nmat4544>.
- 16 [17] S.A. Bradner, M. McGill, A. Golding, R. Grudt, D.L. Kaplan, Silk Hydrogel Microfibers for  
17 Biomimetic Fibrous Material Design, Macromol Mat Eng 304(7) (2019) 1900045.  
18 <https://doi.org/10.1002/mame.201900045>.
- 19 [18] A. Lode, M. Meyer, S. Bruggemeier, B. Paul, H. Baltzer, M. Schropfer, C. Winkelmann,  
20 F. Sonntag, M. Gelinsky, Additive manufacturing of collagen scaffolds by three-dimensional  
21 plotting of highly viscous dispersions, Biofabrication 8(1) (2016) 015015.  
22 <https://doi.org/10.1088/1758-5090/8/1/015015>.
- 23 [19] N. Diamantides, C. Dugopolski, E. Blahut, S. Kennedy, L.J. Bonassar, High density cell  
24 seeding affects the rheology and printability of collagen bioinks, Biofabrication 11(4) (2019)  
25 045016. <https://doi.org/10.1088/1758-5090/ab3524>.
- 26 [20] E.O. Osidak, P.A. Karalkin, M.S. Osidak, V.A. Parfenov, D.E. Sivogrivov, F. Pereira, A.A.  
27 Gryadunova, E.V. Koudan, Y.D. Khesuani, C.V.A. capital Ka, S.I. Belousov, S.V.  
28 Krasheninnikov, T.E. Grigoriev, S.N. Chvalun, E.A. Bulanova, V.A. Mironov, S.P.

- 1 Domogatsky, Viscoll collagen solution as a novel bioink for direct 3D bioprinting, *J Mater Sci*  
2 *Mater Med* 30(3) (2019) 31. <https://doi.org/10.1007/s10856-019-6233-y>.
- 3 [21] K.K. Moncal, V. Ozbolat, P. Datta, D.N. Heo, I.T. Ozbolat, Thermally-controlled  
4 extrusion-based bioprinting of collagen, *J Mater Sci Mater Med* 30(5) (2019) 55.  
5 <https://doi.org/10.1007/s10856-019-6258-2>.
- 6 [22] B.A. Neger, P.T. Brun, C.M. Nelson, Microextrusion printing cell-laden networks of type  
7 I collagen with patterned fiber alignment and geometry, *Soft Matter* 15(28) (2019) 5728-5738.  
8 <https://doi.org/10.1039/c8sm02605j>.
- 9 [23] S. Rhee, J.L. Puetzer, B.N. Mason, C.A. Reinhart-King, L.J. Bonassar, 3D Bioprinting of  
10 Spatially Heterogeneous Collagen Constructs for Cartilage Tissue Engineering, *ACS*  
11 *Biomater Sci Eng* 2(10) (2016) 1800-1805. <https://doi.org/10.1021/acsbiomaterials.6b00288>.
- 12 [24] R.V. Iozzo, L. Schaefer, Proteoglycan form and function: A comprehensive  
13 nomenclature of proteoglycans, *Matrix Biol* 42 (2015) 11-55.  
14 <https://doi.org/10.1016/j.matbio.2015.02.003>.
- 15 [25] C. Loebel, M. D'Este, M. Alini, M. Zenobi-Wong, D. Eglin, Precise tailoring of tyramine-  
16 based hyaluronan hydrogel properties using DMTMM conjugation, *Carbohydr Polym* 115  
17 (2015) 325-33. <https://doi.org/10.1016/j.carbpol.2014.08.097>.
- 18 [26] O.F. Gardner, M. Alini, M.J. Stoddart, Mesenchymal Stem Cells Derived from Human  
19 Bone Marrow, *Methods Mol Biol* 1340 (2015) 41-52. [https://doi.org/10.1007/978-1-4939-](https://doi.org/10.1007/978-1-4939-2938-2_3)  
20 [2938-2\\_3](https://doi.org/10.1007/978-1-4939-2938-2_3).
- 21 [27] C. Loebel, T. Stauber, M. D'Este, M. Alini, M. Zenobi-Wong, D. Eglin, Fabrication of cell-  
22 compatible hyaluronan hydrogels with a wide range of biophysical properties through high  
23 tyramine functionalization, *J Mater Chem B* 5(12) (2017) 2355-2363.  
24 <https://doi.org/10.1039/c6tb03161g>.
- 25 [28] R. Tognato, A.R. Armiento, V. Bonfrate, R. Levato, J. Malda, M. Alini, D. Eglin, G.  
26 Giancane, T. Serra, A Stimuli-Responsive Nanocomposite for 3D Anisotropic Cell-Guidance  
27 and Magnetic Soft Robotics, *Adv Funct Mater* 29(9) (2019) 1804647.  
28 <https://doi.org/10.1002/adfm.201804647>.

- 1 [29] C.E. Ayres, B.S. Jha, H. Meredith, J.R. Bowman, G.L. Bowlin, S.C. Henderson, D.G.  
2 Simpson, Measuring fiber alignment in electrospun scaffolds: a user's guide to the 2D fast  
3 Fourier transform approach, *J Biomater Sci Polym Ed* 19(5) (2008) 603-21.  
4 <https://doi.org/10.1163/156856208784089643>.
- 5 [30] R. Farndale, D. Buttle, A. Barrett, Improved quantitation and discrimination of sulphated  
6 glycosaminoglycans by use of dimethylmethylene blue, *Biochim Biophys Acta Gen Subj*  
7 883(2) (1986) 173-177. [https://doi.org/10.1016/0304-4165\(86\)90306-5](https://doi.org/10.1016/0304-4165(86)90306-5).
- 8 [31] J.A. Buckwalter, V.C. Mow, A. Ratcliffe, Restoration of Injured or Degenerated Articular  
9 Cartilage, *J Am Acad Orthop Surg* 2(4) (1994) 192-201. [https://doi.org/10.5435/00124635-](https://doi.org/10.5435/00124635-199407000-00002)  
10 199407000-00002.
- 11 [32] D. Petta, A.R. Armiento, D. Grijpma, M. Alini, D. Eglin, M. D'Este, 3D bioprinting of a  
12 hyaluronan bioink through enzymatic-and visible light-crosslinking, *Biofabrication* 10(4)  
13 (2018) 044104. <https://doi.org/10.1088/1758-5090/aadf58>.
- 14 [33] A. Frayssinet, D. Petta, C. Illoul, B. Haye, A. Markitantova, D. Eglin, G. Mosser, M.  
15 D'Este, C. Helary, Extracellular matrix-mimetic composite hydrogels of cross-linked  
16 hyaluronan and fibrillar collagen with tunable properties and ultrastructure, *Carbohydr Polym*  
17 236 (2020) 116042. <https://doi.org/10.1016/j.carbpol.2020.116042>.
- 18 [34] M. Binner, L.J. Bray, J. Friedrichs, U. Freudenberg, M.V. Tsurkan, C. Werner, Cell-  
19 instructive starPEG-heparin-collagen composite matrices, *Acta Biomater* 53 (2017) 70-80.  
20 <https://doi.org/10.1016/j.actbio.2017.01.086>.
- 21 [35] K.V. Nguyen-Ngoc, A.J. Ewald, Mammary ductal elongation and myoepithelial migration  
22 are regulated by the composition of the extracellular matrix, *J Microsc* 251(3) (2013) 212-23.  
23 <https://doi.org/10.1111/jmi.12017>.
- 24 [36] A.D. Nocera, R. Comin, N.A. Salvatierra, M.P. Cid, Development of 3D printed fibrillar  
25 collagen scaffold for tissue engineering, *Biomed Microdevices* 20(2) (2018) 26.  
26 <https://doi.org/10.1007/s10544-018-0270-z>.
- 27 [37] D.F. Duarte Campos, M. Rohde, M. Ross, P. Anvari, A. Blaeser, M. Vogt, C. Panfil, G.H.  
28 Yam, J.S. Mehta, H. Fischer, P. Walter, M. Fuest, Corneal bioprinting utilizing collagen-

- 1 based bioinks and primary human keratocytes, *J Biomed Mater Res A* 107(9) (2019) 1945-  
2 1953. <https://doi.org/10.1002/jbm.a.36702>.
- 3 [38] D. Petta, D.W. Grijpma, M. Alini, D. Eglin, M. D'Este, Three-Dimensional Printing of a  
4 Tyramine Hyaluronan Derivative with Double Gelation Mechanism for Independent Tuning of  
5 Shear Thinning and Postprinting Curing, *ACS Biomater Sci Eng* 4(8) (2018) 3088-3098.  
6 <https://doi.org/10.1021/acsbiomaterials.8b00416>.
- 7 [39] A. Sundarakrishnan, H. Zukas, J. Coburn, B.T. Bertini, Z. Liu, I. Georgakoudi, L. Baugh,  
8 Q. Dasgupta, L.D. Black, D.L. Kaplan, Bioengineered in Vitro Tissue Model of Fibroblast  
9 Activation for Modeling Pulmonary Fibrosis, *ACS Biomater Sci Eng* 5(5) (2019) 2417-2429.  
10 <https://doi.org/10.1021/acsbiomaterials.8b01262>.
- 11 [40] H. Kim, J. Jang, J. Park, K.P. Lee, S. Lee, D.M. Lee, K.H. Kim, H.K. Kim, D.W. Cho,  
12 Shear-induced alignment of collagen fibrils using 3D cell printing for corneal stroma tissue  
13 engineering, *Biofabrication* 11(3) (2019) 035017. <https://doi.org/10.1088/1758-5090/ab1a8b>.
- 14 [41] M. Koepf, D.F. Campos, A. Blaeser, K.S. Sen, H. Fischer, A tailored three-dimensionally  
15 printable agarose-collagen blend allows encapsulation, spreading, and attachment of human  
16 umbilical artery smooth muscle cells, *Biofabrication* 8(2) (2016) 025011.  
17 <https://doi.org/10.1088/1758-5090/8/2/025011>.
- 18 [42] M. Betsch, C. Cristian, Y.Y. Lin, A. Blaeser, J. Schoneberg, M. Vogt, E.M. Buhl, H.  
19 Fischer, D.F. Duarte Campos, Incorporating 4D into Bioprinting: Real-Time Magnetically  
20 Directed Collagen Fiber Alignment for Generating Complex Multilayered Tissues, *Adv*  
21 *Healthc Mater* 7(21) (2018) e1800894. <https://doi.org/10.1002/adhm.201800894>.
- 22 [43] Y. Yang, Z. Chen, X. Song, Z. Zhang, J. Zhang, K.K. Shung, Q. Zhou, Y. Chen,  
23 Biomimetic Anisotropic Reinforcement Architectures by Electrically Assisted Nanocomposite  
24 3D Printing, *Adv Mater* 29(11) (2017) <https://doi.org/10.1002/adma.201605750>.
- 25 [44] M. Baniasadi, M. Minary-Jolandan, Alginate-Collagen Fibril Composite Hydrogel,  
26 *Materials (Basel)* 8(2) (2015) 799-814. <https://doi.org/10.3390/ma8020799>.

- 1 [45] I.L. Kim, S. Khetan, B.M. Baker, C.S. Chen, J.A. Burdick, Fibrous hyaluronic acid  
2 hydrogels that direct MSC chondrogenesis through mechanical and adhesive cues,  
3 *Biomaterials* 34(22) (2013) 5571-80. <https://doi.org/10.1016/j.biomaterials.2013.04.004>.
- 4 [46] A.D. Doyle, N. Carvajal, A. Jin, K. Matsumoto, K.M. Yamada, Local 3D matrix  
5 microenvironment regulates cell migration through spatiotemporal dynamics of contractility-  
6 dependent adhesions, *Nat Commun* 6 (2015) 8720. <https://doi.org/10.1038/ncomms9720>.
- 7 [47] T.L. Jenkins, D. Little, Synthetic scaffolds for musculoskeletal tissue engineering: cellular  
8 responses to fiber parameters, *NPJ Regen Med* 4 (2019) 15. [https://doi.org/10.1038/s41536-](https://doi.org/10.1038/s41536-019-0076-5)  
9 019-0076-5.
- 10 [48] S. Yang, X. Shi, X. Li, J. Wang, Y. Wang, Y. Luo, Oriented collagen fiber membranes  
11 formed through counter-rotating extrusion and their application in tendon regeneration,  
12 *Biomaterials* 207 (2019) 61-75. <https://doi.org/10.1016/j.biomaterials.2019.03.041>.
- 13 [49] R. Mohan, N. Mohan, D. Vaikkath, Hyaluronic Acid Dictates Chondrocyte Morphology  
14 and Migration in Composite Gels, *Tissue Eng Part A* 24(19-20) (2018) 1481-1491.  
15 <https://doi.org/10.1089/ten.TEA.2017.0411>.
- 16 [50] E. Amann, P. Wolff, E. Breel, M. van Griensven, E.R. Balmayor, Hyaluronic acid  
17 facilitates chondrogenesis and matrix deposition of human adipose derived mesenchymal  
18 stem cells and human chondrocytes co-cultures, *Acta Biomater* 52 (2017) 130-144.  
19 <https://doi.org/10.1016/j.actbio.2017.01.064>.
- 20 [51] T. Efe, C. Theisen, S. Fuchs-Winkelmann, T. Stein, A. Getgood, M.B. Rominger, J.R.  
21 Paletta, M.D. Schofer, Cell-free collagen type I matrix for repair of cartilage defects-clinical  
22 and magnetic resonance imaging results, *Knee Surg Sports Traumatol Arthrosc* 20(10)  
23 (2012) 1915-22. <https://doi.org/10.1007/s00167-011-1777-5>.
- 24 [52] K.F. Schuettler, J. Struwer, M.B. Rominger, P. Rexin, T. Efe, Repair of a chondral  
25 defect using a cell free scaffold in a young patient--a case report of successful scaffold  
26 transformation and colonisation, *BMC Surg* 13 (2013) 11. [https://doi.org/10.1186/1471-2482-](https://doi.org/10.1186/1471-2482-13-11)  
27 13-11.

- 1 [53] K. Gavenis, U. Schneider, U. Maus, T. Mumme, R. Muller-Rath, B. Schmidt-Rohlfing, S.  
2 Andereya, Cell-free repair of small cartilage defects in the Goettinger minipig: which defect  
3 size is possible?, *Knee Surg Sports Traumatol Arthrosc* 20(11) (2012) 2307-14.  
4 <https://doi.org/10.1007/s00167-011-1847-8>.
- 5 [54] U. Schneider, B. Schmidt-Rohlfing, K. Gavenis, U. Maus, R. Mueller-Rath, S. Andereya,  
6 A comparative study of 3 different cartilage repair techniques, *Knee Surg Sports Traumatol*  
7 *Arthrosc* 19(12) (2011) 2145-52. <https://doi.org/10.1007/s00167-011-1460-x>.
- 8 [55] X. Jiang, X. Huang, T. Jiang, L. Zheng, J. Zhao, X. Zhang, The role of Sox9 in collagen  
9 hydrogel-mediated chondrogenic differentiation of adult mesenchymal stem cells (MSCs),  
10 *Biomater Sci* 6(6) (2018) 1556-1568. <https://doi.org/10.1039/c8bm00317c>.
- 11 [56] C.G. Pfeifer, A. Berner, M. Koch, W. Krutsch, R. Kujat, P. Angele, M. Nerlich, J. Zellner,  
12 Higher Ratios of Hyaluronic Acid Enhance Chondrogenic Differentiation of Human MSCs in a  
13 Hyaluronic Acid-Gelatin Composite Scaffold, *Materials (Basel)* 9(5) (2016)  
14 <https://doi.org/10.3390/ma9050381>.
- 15 [57] V. Moulisova, S. Poveda-Reyes, E. Sanmartin-Masia, L. Quintanilla-Sierra, M.  
16 Salmeron-Sanchez, G. Gallego Ferrer, Hybrid Protein-Glycosaminoglycan Hydrogels  
17 Promote Chondrogenic Stem Cell Differentiation, *ACS Omega* 2(11) (2017) 7609-7620.  
18 <https://doi.org/10.1021/acsomega.7b01303>.
- 19 [58] J. Yang, Y. Liu, L. He, Q. Wang, L. Wang, T. Yuan, Y. Xiao, Y. Fan, X. Zhang, Icarin  
20 conjugated hyaluronic acid/collagen hydrogel for osteochondral interface restoration, *Acta*  
21 *Biomater* 74 (2018) 156-167. <https://doi.org/10.1016/j.actbio.2018.05.005>.
- 22

## 1 6 Figure captions

2 **Figure 7: 3D bioprinting as a tool to produce microscopic anisotropic scaffolds.** Biomaterial and  
3 bioink were prepared by mixing neutralized Col 1 (5 mg/ml) isolated from rat tails with tyramine  
4 modified HA (THA, 25 mg/ml). Neutralized Col 1 was mixed with THA for enzymatic crosslinking either  
5 cell free or containing hMSC cell spheroids. The Col 1 microstructure was investigated after 3D  
6 printing and compared to casted, isotropic samples with different microscopic techniques (Second  
7 Harmonic Generation SHG imaging and confocal microscopy). Cell instructive properties were  
8 analyzed after in vitro culture on cell migration and attachment.

9 **Figure 8: Collagen (Col 1) fibrils distribution in THA hydrogel and rheological properties.** A)  
10 Visualization of Col 1 fibrils within Col 1 hydrogel and B) THA-Col 1 hydrogels using confocal imaging  
11 (immunofluorescent staining for Col 1) and C-D) SHG imaging (no labelling), respectively. Both  
12 techniques illustrate homogenous distribution of Col 1 fibrils (scale bar 100  $\mu\text{m}$ ). E) Turbidity  
13 measurement of THA-Col 1 demonstrated Col 1 fibril formation in composite dependent on Col 1  
14 content. The more Col 1 is present in composite the higher the absorbance at 313 nm over time with  
15 maximum values for Col 1 only. F) Flow curve (viscosity as function of shear rate) demonstrate shear  
16 thinning behavior of THA, THA-Col 1 and neutralized Col 1 marked by decreasing viscosity with  
17 increasing shear rate. Col 1 (pH7, 5 mg/ml) showed lower viscosity compared to THA (25 mg/ml) and  
18 THA-Col 1. Acidic Col 1 (pH 4, 5 mg/ml) lacks shear-thinning behavior with a constant viscosity over  
19 range of tested shear rate. G) Rheological characterization (Amplitude sweep, 1Hz) to evaluate  
20 mechanical properties of biomaterial ink by means of storage ( $G'$ ) and loss ( $G''$ ) modulus of THA-Col  
21 1 and THA after enzymatic crosslinking. Storage modulus increases in composite compared to THA.

22

23 **Figure 9: Cell instructive properties of THA-Col 1 addressing hMSC migration and cell**  
24 **attachment.** A) Confocal images of actin filament stained hMSC spheroids embedded in THA-Col 1 (  
25 THA-Col 1, 25 mg/ml 1:1 Col 1 5 mg/ml), THA (25 mg/ml) and Col 1 (5 mg/ml) at day 0, day 3 and  
26 after 8 days culture. Migration of hMSC was seen for THA-Col 1 and Col 1 but not in THA. Col 1  
27 hydrogel was shrinking over time and formed a small pellet of less than 2 mm in diameter (Scale bar  
28 100  $\mu\text{m}$ ). B) Area of cell migration and C) migration length was higher in Col 1 compared to THA-Col 1  
29 increasing over time. Quantification of migration area and migration length. \*\* $p < 0.01$ , \*\*\* $p < 0.001$ .

1

2 **Figure 10: Chondrogenic differentiation potential of hMSC embedded in THA-Col 1 compared to**  
3 **hMSC pellet culture.** A) Gene expression analysis relative to hMSC pellet or hMSC embedded in  
4 THA-Col 1 hydrogel (TC MSC) control at day 0 for Col 1 (COL 1A1), Col II (COL 2A1), aggrecan  
5 (ACAN), SOX9 and RunX2. Increase in all chondrogenic related genes with minor changes for SOX9  
6 and RunnX2. B) Relative gene expression ratio of Col 2 to Col 1 at day 21. No statistical differences  
7 resulted for all PCR data shown beside for Col2/Col 1 ratio. \* $p < 0.05$  C) Quantification of proteoglycans  
8 (GAG/sample) including total amount of GAGs released into the media supernatant and GAGs  
9 retained in the sample at day 21. D) GAG/DNA increased over time from day 0 to day 21 for MSC  
10 pellet and THA-Col 1 MSC. \*\*\*\*  $p < 0.0001$ . E) Safranin O staining to visualize proteoglycans in ECM  
11 after 21 days in vitro culture at two magnifications for MSC pellet and F) MSC embedded in THA-Col 1  
12 hydrogel (THA-Col 1 MSC) (scale bar 100  $\mu\text{m}$ ).

13

14 **Figure 11: 3DP as tool to align Col 1 fibers and produce microscopically anisotropic scaffolds.**  
15 A) Confocal microscopy of immunofluorescent staining against Col 1 and C) SHG images demonstrate  
16 anisotropic fibers in THA-Col 1 biomaterial ink (scale bar 100  $\mu\text{m}$ ). Unidirectional orientation of parallel  
17 Col 1 fibers aligning along the printing direction (white arrow indicated printing direction). B, D) Bar  
18 diagrams (mean values  $\pm$  standard deviation) display the quantification of fiber alignment in casted Col  
19 1, casted THA-Col 1 (ID 1.0 mm) and printed THA-Col 1 (15G: ID 1.36 mm, 0.25" cylindrical needle)  
20 from images acquired either with confocal microscope (B, green) or SHG (D, blue). Independently of  
21 microscopical method the printed THA-Col 1 samples resulted in unidirectional orientation which was  
22 more random for casted THA-Col 1 and Col 1. White arrow in the bar diagram indicate the peak width  
23 at a normalized grey value of 0.5. E) Schematic illustration of Col 1 fiber alignment in articular  
24 cartilage. F) Polarized light image of articular cartilage illustrating horizontal fibers in superficial zone  
25 (SZ) and vertical orientation in deep zone (DZ) (scale bar 50  $\mu\text{m}$ ). G) Confocal images of immune-  
26 fluorescent labelled Col 1 mimicking hierarchical fiber orientation in articular cartilage with parallel  
27 horizontal fibers in the SZ, more isotropic fibers in the middle zone (MZ) and parallel vertical fibers in  
28 the DZ (scale bar 50  $\mu\text{m}$ ).

29



1 **Figure 12: Viability (Live/dead staining) and phalloidin staining of hMSC spheroids in THA-Col**  
2 **1 hydrogel.** A) Representative images of live/dead staining at day 1 and day 6 showing living cells in  
3 green with few dead cells in red (Scale bar 100  $\mu$ m). Bio-ink was either printed with 15G (ID 1.36 mm)  
4 cylindrical needle, extruded from 3CC cartridge (ID 2.4 mm) or pipetted with CP100 positive  
5 displacement pipette (ID 1.0 mm). B) MAX z-projection of hMSCs after 6 days of culture in THA-Col 1  
6 demonstrating unidirectional actin filaments/cell cytoskeleton (in red) along the Col 1 (green) direction  
7 of printed samples (white arrow indicates printing direction) and cell nuclei (blue). In extruded and  
8 casted samples cells migrated random in the bioink (scale bar 100  $\mu$ m). C) Orientation of cytoskeleton  
9 of hMSCs embedded in THA-Col 1 printed, extruded and casted displaying the mean values in red  
10 with standard deviation in grey. More unidirectional alignment with smaller peak width of cytoskeleton  
11 resulted for 15G printed THA-Col 1 compared to the two other groups. Green arrow in the graph of  
12 printed sample indicates the printing direction.  
13  
14

## 1 Appendix A. Supplementary information

### 2 A.1 Supplementary Materials and Methods

#### 3 A.1.1 3DP THA-Col 1 biomaterial ink with different needle sizes

4 To compare the influence of needle diameter on Col 1 fiber alignment, THA-Col 1 was  
5 extruded (3D Discovery™, RegenHU) through a 15G and 22G needle (0.25" cylindrical  
6 needles, 15G: ID 1.36 mm, 0.2 bar, feed rate 8 mm/s; 22G: ID 0.41 mm, 1.5 bar, feed rate  
7 8 mm/s, Nordson EFD) with subsequent light crosslinking (515 nm LED, feed rate 4 mm/s).  
8 THA-Col 1 (1:1) biomaterial ink was transferred into 3CC barred (ID 2.3 mm, Nordson) for  
9 enzymatic crosslinking (30 min, 37°C), printed with the above-mentioned parameters and  
10 light crosslinked. Col 1 fibers were visualized by fluorescent microscopy after staining as  
11 described in 2.8.1. To quantify fiber orientation the Oval Plugin (imageJ, NIH) was done  
12 similar as for samples described in 2.10.

13

#### 14 A.1.2 PCR: Primer details

15 **Table A1: Primer and probe (Forward, reverse and probe sequence) and Assay-On-Demand**  
16 **(Applied biosystem Assay ID) for gene expression analysis.**

| gene  | Forward primer<br>sequence                 | Reverse primer<br>sequence       | Probe sequence                                      | Assay ID |
|-------|--------------------------------------------|----------------------------------|-----------------------------------------------------|----------|
| hACAN | 5'-AGT CCT CAA<br>GCC TCC TGT<br>ACT CA-3' | 5'-CGG GAA GTG<br>GCG GTA ACA-3' | 5'-CCG GAA TGG AAA<br>CGT GAA TCA GAA<br>TCA ACT-3' | -        |

|              |                                            |                                                 |                                                         |               |
|--------------|--------------------------------------------|-------------------------------------------------|---------------------------------------------------------|---------------|
| hCOL1A1      | 5'-CCC TGG AAA<br>GAA TGG AGA<br>TGA T-3'  | 5'-ACT GAA ACC<br>TCT GTG TCC CTT<br>CA-3'      | 5'-CGG GCA ATC CTC<br>GAG CAC CCT -3'                   | -             |
| hCOL2A1      | 5'-GGC AAT AGC<br>AGG TTC ACG<br>TAC A-3'  | 5'-GAT AAC AGT<br>CTT GCC CCA CTT<br>ACC-3'     | 5'-CCT GAA GGA TGG<br>CTG CAC GAA ACA<br>TAC-3'         | -             |
| hCOL10<br>A1 | 5'-ACG CTG AAC<br>GAT ACC AAA<br>TG-3'     | 5'-TGC TAT ACC<br>TTT ACT CTT TAT<br>GGT GTA-3' | 5'-ACT ACC CAA CAC<br>CAA GAC ACA GTT<br>CTT CAT TCC-3' | -             |
| hRUNX2       | 5'-AGC AAG GTT<br>CAA CGA TCT<br>GAG AT-3' | 5'-TTT GTG AAG<br>ACG GTT ATG GTC<br>AA-3'      | 5'-TGA AAC TCT TGC<br>CTC GTC CAC TCC G-<br>3'          | -             |
| hUBC         |                                            |                                                 |                                                         | Hs00824723_m1 |
| hSOX9        |                                            |                                                 |                                                         | Hs00165814_m1 |

1

## 2 A.2 Supplementary Results

### 3 A.2.1 3DP THA-Col 1 biomaterial ink with different needle sizes

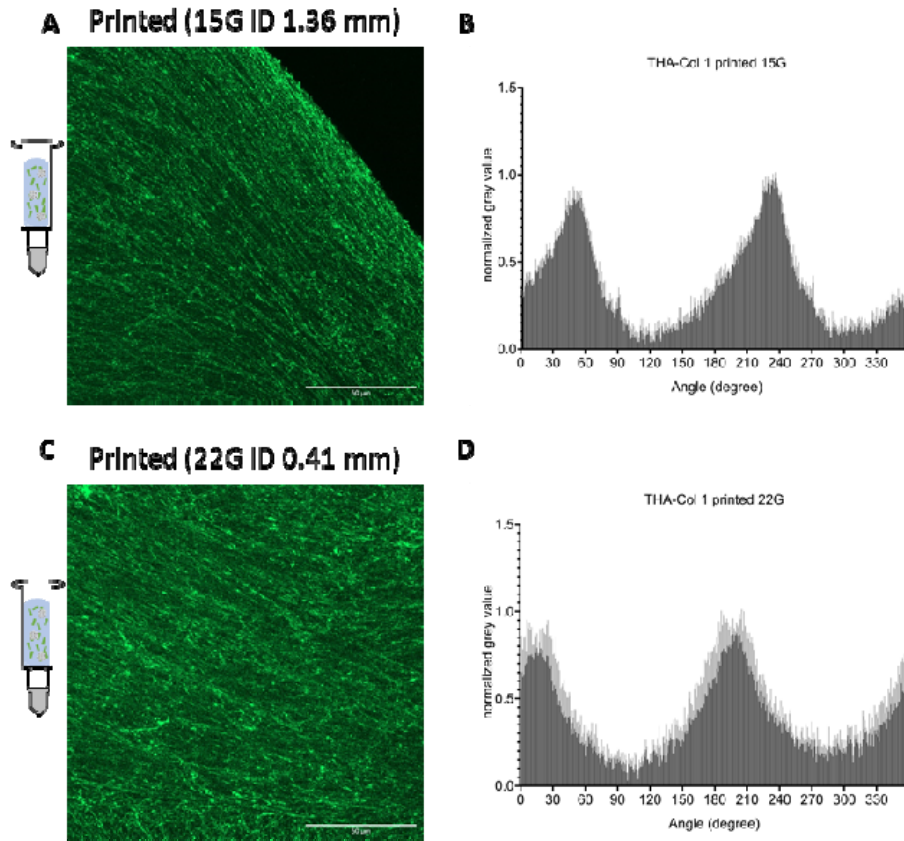

1

2 **Figure A1: Immunofluorescent staining for collagen I of printed THA-Col 1 with 15G (left) and**  
3 **22G (right) needle including printing parameters. A) Orientation of fibers did not display distinct**  
4 **differences. With the thinner needle diameter (22G, ID 0.41 mm) the fibers appear to become**  
5 **disrupted compared to the bigger needle diameter (15G, ID 1.36 mm). Scale bar 50um. B) Bar**  
6 **diagram displaying the quantification of fiber orientation in printed THA-Col 1 based on immune-**  
7 **fluorescent stained images. Peak width at normalized grey value 0.5 was smaller for 15G needle (51**  
8 **degrees) compared to 22G needle (55 degrees) indicating a more heterogenous fiber orientation for**  
9 **the 22G needle.**

10

1 A.2.2 3DP hMSC embedded in THA-Col 1 to analyze orientation of cell

2 migration

3 Overlay of results from orientation of hMSC cytoskeleton and Col 1 fibers as described in

4 2.10 to illustrate the unidirectional migration of hMSC along the direction of Col 1 fibers.

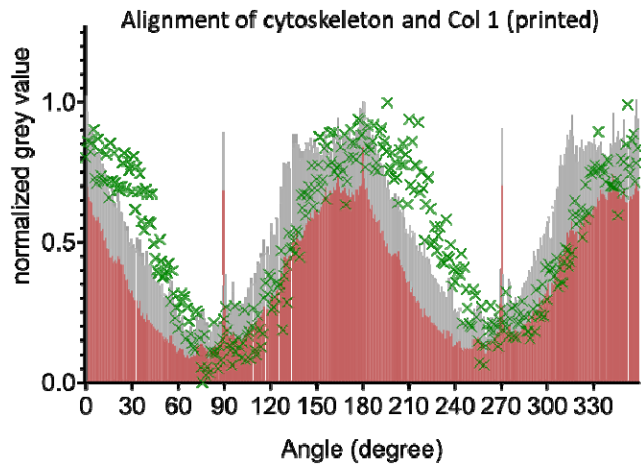

6 **Figure A2: Alignment of cytoskeleton and Col 1 fibrils in printed (15G) THA-Col 1 at day 6.**

7 Overlay of mean orientation of cytoskeleton (red) with standard deviation in grey and the Col 1

8 orientation (green) to demonstrate the unidirectional migration of hMSCs preferably along the the

9 direction of Col 1 fibers (grey).

10
